# Supplementary material for: Valorization of Macroalgal Biomass into Biostimulants and Biofertilizers for Sustainable Agriculture
Source: Research Square preprint supplement (doi:10.21203/rs.3.rs-6989022/v1), 2025-07-03
Supplement: Supplementary file 1 [file eac08d1a3890289dd40b20ae.docx]

**Table S1. Summary of 55 studies in the impact of seaweed-based biostimulants and biofertilizers on plant physiology and development.**

| **Author (Year)** | **Plant Species** | **Seaweed Type / Biostimulant products** | **Doses** | **Application Method** | **Experimental Condition** | **Parameters Improved** | **Physico-chemical Composition** |
| --- | --- | --- | --- | --- | --- | --- | --- |
| Abdel-Sattar et al., 2024 | Mango | *﻿Ascophyllum nodsoum* | 6 L ha−1 | Irrigation | Orchard | ↑N, P, K, Ca, Mg, Fe, and Zn in leaves, chlorophyll a and b, total chlorophyll, and total carbohydrates with 6 L ha−1 application. | ﻿10.58% organic materials (i.e., cytokinins, auxins, betaines, gibberellin, etc.); macroelements (0.7% N, 1.5% P, 6% K, 0.02% Ca, 0.23% S, and 0.04% Mg); microelements (20–50 ppm Fe, 1–5 ppm Cu, 5–15 ppm Zn, 1–5 ppm Mn, and 20–30 ppm B); 7% carbohydrates (alginic acid, mannitol, and laminarin); and 0.1% amino acids. |
| Ahmed et al., 2024 | Tomato | *A. nodosum* (Amino Seaweed, SV Group, Bangkok, Thailand) | ﻿0, 25, 50, 75, and 100% of 5 ml L−1. | Soil drench | Polyhouse | ↑plant height, leaf area, shoot dry matter, root dry matter, leaf greenness (SPAD), leaf relative water content, membrane stability index, net photosynthetic rate, stomatal conductance, transpiration rate, and proline with increasing seaweed application.  ↑fruit yield, fruit number per plant, total water input, water productivity, fruit length, fruit width, total soluble solids (﻿°Brix), fruit firmness, color index, and fruit pH with increasing seaweed application.  ↓electrolyte leakage with increasing seaweed application. | ﻿44% organic matter; more than 13% alginic acid; 2.1% total N; 2.7% P; 15.9% K; a minor amount of amino acid; vitamins; and minerals. |
| Al-Saif et al., 2023 | Apricot (*Prunus armeniaca*) | Qingdao Haidelong Biotechnology Co., Ltd., Qingdao, China. | ﻿1000, 2000, and 3000 mg L−1. | Foliar | Field | ↑shoot length, leaf area, chlorophyll content, and leaf mineral content (N, P, K, Ca, Mg, Fe, Zn, and Mn) in 2000 and 3000 mg L−1 application. | alginic acid 16%; organic matter 50%; N 1%; K2O 16–21; cytokinin and gibberellin 600–800 mg L−1; mannitol 1–6%; Fe 0.2%; Ca 0.15%; Mg 0.2%; and S 1%. |
| Alebidi and Abdel-Sattar, 2024 | Orange | *﻿*Qingdao Haidelong Biotechnology Co., Ltd., Qingdao, China. | ﻿0, 5, and 10 g L−1. | Foliar | Orchad | ↑leaf minerals (N, P, K, Ca, Mg, Fe, and B) and chlorophyll content under all seaweeds application. | Cytokinin and gibberellin 600–800 mg L−1; alginic acid 16%; mannitol 1–6%; organic matter 50%; N 1%; K2O 16–21%; Fe 0.2%; Ca 0.15%; Mg 0.2%; and S 1%. |
| Amato et al., 2024 | Oregano plants | *﻿﻿A. nodosum* (Acadian® MPE, Acadian Sea plants Lte, Dartmouth, NS, Canada). | 1 g L−1 | Foliar | Field | ↑plant height, stem height, inflorescence height and total phenolic content. | ﻿Organic N 1%; K2O 19%; betaines 0.1%; mannitol 4%; total organic C of biological origin 20 %. |
| Ashour et al., 2024 | Fenugreek and Faba bean. | ﻿TAM®  (*Ulva lactuca*, *Pterocladia capillacea*, and *Jania rubens*). | 0, 0.037, 0.075, 0.15, 0.3, 0.6, 1.2, 2.4, and 4.80 mg mL−1. | Seed soaking | Petri-dishes | ↑germination rate with ﻿0.30, 0.075, 0.037, and 0.15 mg mL−1 application in Faba bean.  ﻿↑germination rate with 0.037, 0.075, 0.15, and 0.30 mg mL−1 in Fenugreek.  ↑root length ﻿0.037 mg mL−1 application in Faba bean and Fenugreek. | pH 9-9.5; total dissolved solids 2.6%; total organic matter 8.2%; total polysaccharides 15%; B 2.16%; C 13.97%; O:50.34%; Na 0.53%; Al: 9.72%; Si 0.07%; P 0.28%; Cl: 0.4%; K 22.37%; Ca 0.17%. |
| Baltrusch et al., 2023 | Watercress (*﻿Nasturtium officinale*) | *Sargassum muticum* (three extract methos: spray-drying (SD), freeze-drying (FD), and convective air-drying (CAD)). | ﻿Control, 5, 0.5, 0.05, and 0.005 g L−1. | Foliar | Petri-dishes | ↑root development in 5 mg L−1 of SD extracts application.  ↑ ﻿Munoo-Liisa vitality index and root development in 50 mg L−1 of FD extracts application. | FD: C 16.74%; N 0.78%; P 0.33%; K 12.99%; Ca 0.18%; Mg 1.6%; Na 5.55%; etc.  SD: C 19.2%; N 1.02%; P 0.39%; K 13.30%; Ca 0.24%; Mg 1.69%; Na 5.75%; etc.  CAD: C 16.04%; N 0.75%; P 0.32%; K 14.59%; Ca 0.23%; Mg 1.8%; Na 6.57%; etc. |
| Bernardes et al., 2023 | ﻿*Alibertia edulis* | *﻿A. nodosum* (﻿Acadian®)*.* | ﻿0 (without), 5-, 10-, 15-, and 20-mL L−1 of water. | Foliar | Green house | ↑seedling height, diameter, number of leaves per plant, chlorophyll index, and leaf area with 15 mL L−1 application.  ↑seedling height, leaf area, root dry mass, N concentration, and N uptake efficiency with 20 mL L−1 application. | Water solubility 100%; pH 7.4–8.2; organic matter 13–16%; total N 0.30–0.60%; available phosphorus (P2O5) < 0.1%; soluble potassium (K2O) 5.00–7.00; S 0.30–0.60%; Mg 0.05–0.10%; Ca 0.10–0.20%; Fe 30–80 ppm; Cu 1–5 ppm; Zn 5–15 ppm; Mn 1–5 ppm; B 20–50 ppm; carbohydrates = alginic acid; mannitol, fucoidins, and amino acids = 1.01%. |
| Bilias et al., 2024 | Lettuce | *Ascophillum nodosum* (﻿Actiwave®). | 5 ml L−1. | Soil drench | Green house | ↑fresh weight above ground, plant-tissue macronutrients (N, P, and K) and Na concentrations; ﻿and plant-tissue micronutrients (Fe and Zn) concentrations under seaweed application.  ↓﻿plant-tissue micronutrients (Cu) concentrations under seaweed application. | Organic N 1.00%; Urea N 2.00% Water soluble K2O oxide 7.00%; Total Organic Matter 20.6%; Water Soluble Fe 0.50%; chelated Fe EDDHSA 0.50%; water soluble Zn 0.08%; chelated Zn EDTA 0.08% (w/w). |
| Cano-Benitez et al., 2024 | Avocado | *﻿A. nodosum* | ﻿0-, 2.5-, 5-, and 7.5-ml L-1. | Foliar or drench. | Shade house | ↑total dry weight and stomatal conductance (gs) in ﻿≥5 ml L−1 at 20 weeks after the start of treatment (WAT) for seedlings.  ↑growing index and gs in ﻿≥5 ml L−1 at the last sampling point for young trees. | ﻿pH range 8–10; organic matter range 14.5–17.5% w/w; K 4% w/w; and K2O 4.8% w/w. |
| Chaudhary et al., 2023 | Saffron | ﻿﻿AQU-ICSP (80% *Kappaphycus alvarezii* (KA) aqueous extract + 20% *S. wightii* (SW) aqueous extract on a dry weight basis) | 5% | Corm dipping, foliar, soil drench, and corm dipping + foliar. | Field | ↑dry weight of stem, leaves, corms, total roots per corm, crom production; chlorophyll, carotenoids, photosynthetic rate in corm + dipping foliar treatment.  ↓nutrient concentrations in corms in corm + dipping foliar treatment. | KA: N 0.33%; P 0.08%; K: 30.24%; S 3.3%; Ca 1.3%; Mg 1%; B 21.7 ppm; Fe: 202.5 ppm; Cu 1 ppm; Zn 2 ppm; gibberellic acid 14 ppm; indole acetic acid 1.1 ppm; zeatin 0.6 ppm; total polyphenols 1.2 g gallic acid equivalent 100 g−1; total flavonoid 69 mg quercetin equivalent 100 g−1.  SW: N 0.1%; P 0.95%; K: 9.7%; S 3.2%; Ca 1.1%; Mg 0.8%; B 57 ppm; Fe: 83 ppm; Cu 3.2 ppm; Zn 4.4 ppm; gibberellic acid 0 ppm; indole acetic acid 0.4 ppm; zeatin 4 ppm; total polyphenols 1.0 g gallic acid equivalent 100 g−1; total flavonoid 65 mg quercetin equivalent 100 g−1. |
| Cirillo et al., 2024 | Apricot | *A. nodosum* (﻿Enerleaf product). | 400 mL per 100 L of water. | Foliar | Field | ↑chemical characterization of the main polyphenols (quinic acid, ﻿protocatechuic acid, ﻿p-coumaric acid, ﻿acid syringic acid, ﻿ferulic acid, ﻿sum of total polyphenols) in seaweed application.  ↓total acidity in seaweed application. | Organic C at 2.5% (25 g L−1); alginic acid at 10% (10 g L−1); and mannitol at 0.4% (4 g L−1). |
| Consentino et al., 2023a | Strawberry | ﻿﻿*Ecklonia maxima* (Kelpstar®, Mugavero fertilizers, Palermo, Italy). | 0 and 3 L m−2 | Foliar | Field | ↑plant height, shoot number, root collar diameter, plant visual quality, and dry matter with seaweed application. | Organic N 1%; organic C 10%; auxyn 11 mg L−1; cytokinin 0.03 mg L−1; ﻿and organic substances (weight < 50 kDa) (30%). |
| Consentino et al., 2023b | Basil | Kelpstar | 0 and 0.5 L m−2 | Foliar | Field | ↑stomatal conductance, water productivity, total chlorophyll, nitrogen use efficiency, nitrate, phenolics, ascorbic acid, linalool content, ﻿﻿trans-2-hexanal, eucalyptol with seaweed application.  ↓α-bergamotene with seaweed application. | Organic N 1%; organic C 10%; auxyn 11 mg L−1; cytokinin 0.03 mg L−1; and organic substances (weight < 50 kDa) (30%). |
| Cortiello et al., 2024 | Potato | *﻿*Fitostim® Alga | 150 g hL−1 | Foliar | Field | ↑chlorophyll, leaf number plant, and plant height under seaweed application. | ﻿Organic N 2%; organic C 10%; and organic matter 50% < 50 kD. |
| Drygaś et al., 2024 | Arugula | *A. nodosum* | Control (tap water only), 2.5%, 5%, and 10%. | Soil drench | Growth chamber | ↑phenolic compounds, flavonoids, and antioxidant activity against DPPH, ﻿superoxide dismutase under 2.5% application.  ↑phenolic compounds, flavonoids, and antioxidant activity against DPPH under 5% application.  ↑﻿superoxide dismutase under 10% application.  ↓phenolic compounds under 10% dose.  ﻿↑phenylalanine ammonia lyase and ﻿polyphenol oxidase, catalase, under all seaweed application. | 2.5% (mg L−1): Ca 1.9; Mg 2.76; K 14.1; P 0.24; other micronutrients.  5% (mg L−1): Ca 3.76; Mg 5.78; K 29.01; P 0.187; other micronutrients.  10% (mg L−1): Ca 7.96; Mg 11.74; K 57.64; P 1.833; other micronutrients. |
| Dutta et al., 2023 | Kiwifruit (five different cultivars: ﻿Monty, Abott, Hayward, Allison, and Bruno). | *Gracilaria edulis* (GA), *K. alvarezii* (KA), *A. nodosum* (AN), and *E. maxima* (EM). | Water (control), 1, 5, 10, and 50%. | Basal dipping (6 h) | Polyhouse | ↑rooting percent in all the kiwifruit cultivars with the application of seaweed extracts.  ↑shoot and root growth parameters including leaf number per cutting, number of roots per cutting, number of branches, plant height, shoot diameter, root length, root diameter and root weight were all positively increased with the application of seaweed extracts.  ↑﻿levels of pigments (chlorophyll a, chlorophyll b and total carotenoids), metabolites (total carbohydrates and soluble phenols) with the application of seaweed extracts.  ↓level of electrolyte leakage in all the kiwifruit cultivars with the application of seaweed extracts. | GA: IAA 8.67 mg L−1; zeatin 3.13 mg L−1; K+ 682.1 mg L−1; Zn2+ 0.628 mg L−1; Mn2+ 32.9 mg L−1; Fe2+ 12.7 mg L−1; Cu2+ 0.044 mg L−1.  KA: IAA 21.11 mg L−1; kinetin 9.21 mg L−1; zeatin 3.13 mg L−1; Gas 25.72 mg L−1; K+ 33654 mg L−1; Zn2+ 4.7 mg L−1; Mn2+ 2.1 mg L−1; Fe2+ 86.1 mg L−1; Cu2+ 0.65 mg L−1; P3+ 17.4 mg L−1.  AN: IAA 0.05 g per 15ml H20; ABA 0.02 g per 15ml H20; K+ 2%-3%; Zn2+ 50–200 mg kg−1; Fe2+ 150–1000 mg kg−1; P3+ 0.1–1.15 %.  EM: ABA 0.31 to 20.70 pg mL−1; GAs 184–596 pg mL−1; brassinosteroids brassinolide (BL) 384.72 to 793.23 pg mL−1. |
| El-Shenody et al., 2023 | *Eruca vesicaria* | *Laurencia obtuse*, *Cystoseira tamariscifolia*, and *U. compressa* (DRSB extract). | Water (control) and 100 mL pot−1of DSRB extract. | Foliar, seed priming, and foliar + seed priming. | Green house | ↑root length, shoot length; root fresh weight; shoot fresh weight; dry weight; leaf area; chlorophyll a; chlorophyll b; carotenoids; total pigments; shoots mineral nutrients (K, Ca, Mg, and Fe); total phenolics; total flavonoids; total antioxidant activity; with foliar application.  ↑shoot length; root fresh weight; shoot fresh weight; dry weight; leaf area; chlorophyll a; chlorophyll b; carotenoids; total pigments; shoots mineral nutrients (K, Ca, Mg, and Fe); with seed priming application.  ↓total phenolics and ascorbic acid content with seed priming application.  ↑shoot length; root fresh weight; shoot fresh weight; dry weight; leaf area; chlorophyll a; chlorophyll b; carotenoids; total pigments; shoots mineral nutrients (K, Ca, Mg, and Fe); total flavonoids with foliar+seed priming application.  ↓total phenolics with foliar+seed priming application. | Total N 15.1 mg L−1; total P 6 mg L−1; total K 335 mg L−1; Ca 53.3 mg L−1; Mg 87.5 mg L−1; Fe 1.1 mg L−1; Mn 0.05 mg L−1; Cu 0.02 mg L−1; and Zn 0.09 mg L−1. |
| El-Ziat et al., 2024 | French Marigold | ﻿Algeser (Shoura Chemicals Company, Cairo, Egypt) | ﻿2.0, 4.0-, and 6.0-ml L−1. | Foliar | Green house | ↑plant height, branches number per plant, stem diameter, leaf area, leaves number, plant fresh weight, plant dry weight, chlorophyll a, chlorophyll b, total chlorophyll, carotenoids, total sugars, free amino acids, vitamin C, peroxide, N leaves, P leaves, and K leaves in 4- or 6-ml L-1 treatments. | N 1 – 1.5%; P 0.02 – 0.09%; S 3—9%; K 1 – 1.2%; Ca 02 – 1.5%; Mg 0.5 – 0.9%; Zn 10 – 100 mg L−1; Mn 5 – 12 mg L−1; Fe 50 – 200 mg L−1; B 20 – 100 mg L−1; Cu 1 – 6 mg L−1; Mo 1 – 5 mg L−1; etc. |
| Engel et al., 2023 | Soybean | *A. nodosum* (Acadian Plant Health™). | 0.25 and 0.50% | Foliar | Green house | ↑plant height, leaf dry weight, stem dry weight, leaf amino acids, leaf Mg, in 0.50% application.  ↑leaf dry weight, leaf amino acids, and leaf S in 0.25% application.  ↓nitrate reductase activity, ﻿xylem sap ureides, and ﻿xylem sap amino acids in 0.50% application.  ↓nitrate reductase activity, xylem sap ureides, and ﻿xylem sap amino acids in 0.25% application. | N 8.12 g kg−1; P 6.82 g kg−1; K 12.00 g kg−1; Ca 1.60 g kg−1; Mg 2.03 g kg−1; S 8.16 g kg−1; B 5.74 mg kg−1; Cu 13.60 mg kg−1; Fe 11.5 mg kg−1; Mn 0.04 mg kg−1; Zn 24.40 mg kg−1; Na 20 mg kg−1; water-soluble K₂O 61.48 g L−1; total organic carbon 69.60 g L−1; density 1.16 g dm−3. |
| Espinosa-Antón et al., 2023 | Tomato | ﻿*U. ohnoi* | ﻿5 gram of seaweed powder (SP) and 50 mL of seaweed extract at 2% (SE). | Soil drench | Green house | ↑ root and shoot length, root and shoot area, root and shoot fresh weight, root and shoot dry weight, chlorophyll, macronutrients (N, P, K, S, and Mg), micronutrients (Fe, Cu, Zn, and Na), under seaweed powder application.  ↑root length, root area, root fresh weight, root dry weight, macronutrients (K), micronutrients (Fe and Na), under seaweed extract application. | SP: pH 6.56; ﻿electrical conductivity (dS m−1) 3.78; organic matter 71.26%; protein 14.72%; ash 28.74%; C 29.92%; N 3.12%; P 0.09%; K 3.98%; Ca 0.49%; Mg 1.83%; and micronutrients.  SE: pH 5.67; ﻿electrical conductivity (dS m−1) 1.94; organic matter 0.14%; protein 0.026%; ash not determined; C 0.059%; N 0.005%; P 0.006%; K 0.053%; Ca 0.019%; Mg 0.029%; and micronutrients. |
| Farruggia et al., 2024a | Oregano | *Aschophyllum nodosum*. | 0.125 and 0.250 L hL−1. | Foliar | Field | ↑plant height, chlorophyll content with all seaweed application in all years.  ↓relative water content in first year with 0.125 L hL−1application.  ↑﻿oregano inflorescence and leaf percentages, with all seaweed application in first year.  ↓oregano inflorescence and leaf percentages, with all seaweed application in second year.  ↓stem percentages, with all seaweed application in first year.  ↓stem percentages, with all seaweed application in second year.  ↑total fresh and dry yield, essential oil content, and essential oil yield, with all seaweed application in all years.  ﻿↓total phenolic content and antioxidant activity with all seaweed application in all years.  ↓rosmarinic acid content with 0.25 L hL-1 seaweed application in second year. | Organic C 10.0%; organic N 1.0%; phytohormones 30%; and organic substances naturally contained in seaweed extracts. |
| Farruggia et al., 2024b | ﻿Sage (*Salvia officinalis* L.) | *﻿E. maxima* (EM) and ﻿*A. nodosum* (AN) by ﻿Mugavero fertilizers company. | 6 L ha−1 | Foliar | Field | ↑﻿plant height, total fresh yield, under EM application.  ↑plant height, chlorophyll content, relative water content (second year), total dry yield, under AN application.  ↓﻿total phenolic and rosmarinic under all seaweed application. | EM: ﻿organic N 1%; organic C 10%; auxin 11 ml l−1; cytokinin 0.03 mg l−1; and organic substances with nominal molecular weights< 50 kDa (30%).  AN: ﻿organic N 1%; organic C 10%; and phytohormones and organic substances with nominal molecular weights< 50 kDa (30%). |
| Gandhi et al., 2024 | Corn | ﻿*K. alvarezii* (KAE), ﻿*G. debilis* (GDE), and ﻿*S. cinctum* (SCE). | ﻿0, 2.5, 5, 7.5, 10, 12.5 or 15%. | Foliar | Field | ↑vegetative dry matter accumulation (DMA) with 5% and 7.5% of KAE.  ↑vegetative DMA with dosage up to 10% of GDE and SCE.  ↑dry root weight with up to 15% in KAE and SCE, and up to 12.5% in GDE. | KAE: K 31.2%; Fe 149.6 mg kg−1; indole acetic acid (IAA) 5.1 mg L−1; ﻿zeatin 10 mg L−1; gibberellic acid (GA3) 25.3 mg L−1; ﻿total phenols 1583 ﻿mg GA (100g) −1; flavonoids ﻿83 mg QE (100g) −1; etc.  GDE: K 27.3%; Fe 144.5 mg kg−1; indole acetic acid (IAA) 3 mg L−1; ﻿zeatin 22.7 mg L−1; gibberellic acid (GA3) 22.3 mg L−1; ﻿total phenols 1381 ﻿mg GA (100g) −1; flavonoids ﻿72.2 mg QE (100g) −1; etc.  SCE: K 27.3%; Fe 146.9 mg kg−1; indole acetic acid (IAA) 9.8 mg L−1; ﻿zeatin 10.4 mg L−1; gibberellic acid (GA3) 3.6 mg L−1; ﻿total phenols 1438 ﻿mg GA (100g) −1; flavonoids ﻿75.1 mg QE (100g) −1; etc. |
| ﻿García-Cano et al., 2023 | Cucumber | ﻿Lombrico® ARREL (﻿Alfredo Iñesta S.L) | 0.1, 0.2, 0.3 mL plant−1. | Nutrient solution | Growth chamber | ↑shoot height, fresh and dry aerial weight, leaf count, leaf area, root volume, fresh and dry root weight with increasing seaweed application.  ↓root length with increasing seaweed application. | Total N ﻿2.3% w/w; organic N ﻿2.2% w/w; ﻿amino acids 6% w/w. |
| Gul et al., 2023 | Radish | ﻿*Enteromorpha intestinalis* | 0%, 1.5% and 3%. | Soil amendment | Green house | ↑total carbohydrate, chlorophyll a and b, carotenoids, Na; total plant weight under all application seaweed.  ↓shoot dry weight, flavonoids, and protein under all application seaweed. | pH 6.8; Ca 23.45 mg g−1; Mg 51 mg g−1; Na 31 mg g−1; K 21 mg g−1; EC 680 ﻿μS. |
| ﻿Hernández-Herrera et al., 2024 | Tomato | *﻿Padina gymnospora* | 100 mL at 20, 25, and 30 days after germination. | Irrigation | Growth chamber | ↑ ﻿maximum electron transport rate (ETRMAX) and APX activity under seaweed application.  ↓flavonoids and CAT activity under seaweed application. | Macronutrients (%, DW): organic C 0.014, total N 0.019, relationship C/N 0.73, total P <0.0001, P2O5 <0.0001, total K 0.07, K2O 0.08, total Ca 0.0011, total Na 0.538, chlorides 0.0391, sulfates (S-SO4) 0.0327, bicarbonates (HCO3) 0.0049; Micronutrients (%, DW): Fe 0.0002, Zn 0.0001, Cu 0.00001, B 0.00016. |
| Hussein et al., 2024 | Fenugreek | *A. nodosum* (﻿Wokozim, India). | 0 and 5 ml L−1. | Irrigation | Greenhouse | ↑yield, shoot dry weight, root fresh weight, root dry weight, chlorophyll a, chlorophyll b, carotenoid, carbohydrate, proline, malondialdehyde, membrane stability index, chlorophyll fluorescence, phenol, flavonoids, vitamin C, peroxidase, superoxide dismutase, N, P, K, Ca, Fe, Mn, Cu, Zn, and As with seaweed application. | Cytokinins; auxins; betaines; total N 5.2%; Fe 0.05%; Mn 0.05%; Zn 0.05%; and Cu 0.03%. |
| Jesus et al., 2024 | Soybean | *A. nodosum* (﻿Brandon Bioscience, Tralee, Ireland). | Combination of the biostimulant dose (0.5, 1.0 and 1.5 L ha−1) and application timings. | Foliar | Green house | ↑﻿net hotosynthesis, water status, and plant growth with ﻿*A. nodosum*-based biostimulant at 1.5 L ha−1 application (0.75 L ha−1 at Vegetative 4 + 0.75 L ha−1 at Reproductive 1). | Ash (35.81 ± 0.87% w/w); total carbohydrates  (63.52 ± 0.55% w/w); polyphenols (0.55 ± 0.06% w/w); other  organic compounds (0.12 ± 0.03% w/w); and low macronutrients content with N (0.3–0.4% w/w), P (0.1–0.2% w/w)  and K (2–3% w/w). |
| Karthik and Jayasri, 2023 | Mung bean | *﻿Portieria hornemannii* (PSF)*.* | ﻿0 and 30% | Seed soaking and foliar | Green house | ↑seed germination (30%), shoot length (28%); root length (120%), leaf count (53%), leaf area (62%), fresh weight (41%), dry weight (54%), carotenoid (80%), chlorophyll a (29%), chlorophyll b (41%), carbohydrate (18%), protein (21%), amino acids (21%), phenolic content (49%) under seaweed application. | ﻿N 10500 mg kg−1; P 700 mg kg−1; K 9300 mg kg−1; Ca 35000 mg kg−1; Mg 7100 mg kg−1; Na 2600 mg kg−1; Fe 1300.55 mg kg−1; Mn 165.86 mg kg−1; Zn 24.18 mg kg−1; and Cu 20.74 mg kg−1. |
| Kisvarga et al., 2024 | ﻿*Ocimum basilicum* Rokokó | *﻿E. maxima* (﻿Kelpak® (Kelp Products (Pty) Ltd.) | 0 and 0.2%. | Foliar | Green house | ↑leaf area, fresh stem weight, indexed chlorophyll content, peroxidase, and proline with seaweed application.  ↓average number of glands, and average gland number per leaf area with seaweed application. | ﻿N content 0.05%; P2O5 0.03%; and K2O 0.65%. |
| Kovács et al., 2024 | *Weigela florida* ‘eva rathke’ | *﻿E. maxima* (﻿Kelpak®, ﻿KELP PRODUCTS (PTY) Ltd. 7975 Simon’s Town, Blue Water Close, South Africa). | 0.4% | Foliar | Nursery | ↑﻿enzymes alkaline phosphatase with seaweed application.  ↓﻿transpiration, ﻿β-glucosidase, ﻿and β-glucosaminidase with seaweed application. | ﻿N content 0.05%; P2O5 0.03%; and K2O 0.65%. |
| Kumar et al., 2023 | Ground nut | ﻿*Halimeda macroloba* | No fertilizer (control), 25% (2g kg−1); 50% (4 g kg−1); 75% (6 g kg−1); 100% (8 g kg−1). | Soil drench | Field | ↑ ﻿plant growth parameters such as plant height, number of branches, number of leaves, root nodules, peg formation, shoot length, root length, chlorophyll a, chlorophyll b, and total chlorophyll, chemical profile, better xylem and phloem enlargement with seaweed application. | 3771 mg per 100 g of Ca. |
| Lobato et al., 2023 | Potato | ﻿*Undaria pinnatifida* | ﻿3 ml plant−1 with different dilution: 3, 10, and 30% (v/v in water). | Foliar | Green house | ↑chlorophyll content with seaweed application. | Phenolic compounds 107 μg ml−1; total water-soluble sugars 122 μg ml-1; proteins 1.45 μg ml-1; DPPH -antioxidant activity 34%. |
| Marey and Elmasry, 2024 | Onion | ﻿Stimu grow seaweed extract (Queisna comp. Egypt). | 0.5 g L−1 | Foliar | Field | ↑plant height, leaves number per plant, fresh weight of plant in two years application.  ↑neck diameter, bulb diameter, bulbing ratio in two years (except bulb diameter in the second year). | K2O 18%; CaO 0.5−2%; MgO 0.5−2%; Fe 0.15−0.3%; Cu 0.30−0.45%; alganic acids 8−9%; amino acids 5%; and 45−55% plant growth regulators. |
| Mattner et al., 2023 | Strawberry | *Durvillea potatorum* and *A. nodosum* (Seasol®; Seasol International, Bayswater, Victoria, Australia). | 1:400 dilution; 10 L ha⁻¹ drench monthly + foliar spray to runoff. | Combination of soil drench and foliar. | Field | ﻿↑﻿Hydrogen peroxide and peroxidases ﻿in root tip cells of strawberry with seaweed application. | pH 10.5; N 0.2 % (w/v); P 0.02%; K 3.7%; S 0.3 %; Ca 458 mg L−1; Mg 972 mg L−1; Fe 115 mg L−1; Mn 2 mg L−1; B 15 mg L−1; and Zn 5 mg L−1. |
| Mbuyisa et al., 2024 | Potato | *﻿A. nodosum* (﻿Nature’s Choice, ﻿Dis-Chem, Woodburn Mall, Pietermaritzburg, South Africa) | 0- and 50-mL plant−1. | Foliar | Green house | ↑plant height, number of leaves, leaf area, leaf chlorophyll index, fresh and dry mass, total tuber yield per plant, and fresh tuber mass with seaweed application. | N 0.08%; P 4.2%; K 102.6%; Ca 10.4%; Mg 16.6%; Na 127.2 mg kg−1; Zn 0.9 mg kg−1; ascorbic acid (vitamin C) 86.5 mg g−1 DM; total phenolics 11.9 mg GAE g−1 DM; total flavonoids 28.6 mg QE g−1 DM; total protein 104.7 mg g−1 DM; ﻿Antioxidant activity [DPPH (diphenyl-1- picrylhydrazyl)] 105.3 mg AAE g−1 DM. |
| Mohamed et al., 2023 | Date plam | *﻿Turbinaria triquetra* | ﻿Control, 25, 50, 100 mg L−1. | Foliar | Green house | ↑plant height, leaf area, number of branches, dry weight, chlorophyll a, chlorophyll b, total chlorophyll, carotenoids, total phenolic, total flavonoids, total flavonoids/total phenolic, total soluble sugar, and enzyme activity (peroxidase and polyphenol oxidase) in all doses.  ↑enzyme activity (catalase) in 50, 100 mg L−1.  ↓enzyme activity (catalase) in 25 mg L−1. | Macro and micronutrients (﻿µg g−1): Se 41; Cr 8.9; Mn 54; Co 14.3; Ni 41.6; Cu 4.3; Zn 165.6; As 0.981; Mo 0.6; Ag 0.1; Cd 0.1; K 8.9; Si 378.94; Al 211.2; Fe 279.6; Mg 886.57; Ca 3162.08; etc. |
| Mutlu-Durak et al., 2024 | Wheat | *Cystoseira barbata* | ﻿2, 4, and 6 mL per 150 mL. | Substrate | Growth chamber | ↑shoot length, fresh weight, root fresh weight with high rates application of seaweed. | Water extract: Ca 0.32 g L−1; K 5.42 g L−1; Ng 0.32 g L−1; P 0.11 g L−1; S 1.31 g L−1; B 5.75 mg L−1; Cu 0.23 mg L−1; Fe 11.1 mg L−1; Mn 2.11 mg L−1; and Zn 0.23 mg L−1. |
| Nikoogoftar-Sedghi et al., 2023 | Pistachio | *A. nodosum* (Acadian plant company made in Canada). | 0 g L−1 (water control), 1 g L−1, 2 g L−1, 3 g L−1. | Foliar | Orchard | ↑soluble protein, soluble carbohydrates, total phenols, antioxidant activity, and total flavonoids under twice seaweed application.  ↓peroxidase, catalase, ﻿superoxide dismutase, ﻿and ascorbate peroxidase under twice seaweed application. | 5% organic matter; 17% K soluble in water; a small amount of N and P. |
| Nivetha et al., 2024 | Corn | *﻿K. alvarezii* | 20 mL L−1 at 14 days after sowing and 40 mL L−1 at 28 days after sowing. | Foliar | Green house | ↑number of leaves, chlorophyll a, chlorophyll b, carotenoids, total soluble sugars, total free amino acids, total flavonoids, and leaf thickness with seaweed application. | Dry matter 23%; Total N < 0.100 %; P₂O₅ mineral acid soluble 0.04%; K₂O mineral acid soluble 7.25%; K₂O water-soluble 7.07%; Mg 0.29%; Ca 0.43%; S 0.81%; Na 1.13%; Ash 15.48 %; organic matter 7.49%; alkaline active components (calculated as CaO) < 0.0100%; Co 0.83 mg kg−1; Cu < 2.00 mg kg-1; Se < 0.200 mg kg−1; Zn 6.35 mg kg−1; pH value 4; B 22.1 mg kg−1. |
| Ntanasi et al., 2024 | Tomato | *﻿A. nodosum* (﻿Algastar® Mugavero fertilizers, Termini Imerese, Italy). | ﻿2 ml L−1 | Foliar | Green house | ↑K and Ca in the leaves, and Na and Mn in the fruit for Thessaloniki variety with seaweed application.  ↓Na in the leaves in Tomataki and Thessaloniki varieties with seaweed application. | ﻿1% total organic N; 10% total organic; 30% total organic substance, with nominal molecular weight <50 kDa. |
| Pacheco et al., 2023 | Lettuce | *Saccharina latissima* | 0 and 1.2 %. | Foliar | Green house | ↑leaf development and weight, leaf Mn, and leaf Mg with seaweed application. | Ash ﻿17.81 g 100 g−1; N ﻿2.31 g 100 g−1; Na ﻿1.26 g 100 g−1; Mn ﻿0.01 g 100 g−1; ﻿Cu 0.01 g 100 g−1. |
| Radwan et al., 2023 | Watermelon | ﻿*U. lactuca* | 0, 3, 5, and 8%. | Seed soaking | Green house | ↑seed germination, ﻿shoot length, root length, number of branches, leaf area, ﻿content of chlorophyll a, chlorophyll b, carotenoids, ﻿superoxide dismutase (SOD), catalase (CAT), and peroxidase (POD) activities with 8% seaweed application. | 0.93 mg g−1 total carbohydrates; 3.01 mg g−1 of lipids; 3.21 mg g−1 protein; glycine betaine 5.13 mg g−1; and total phenolics 0.0188 mg g−1. |
| Rana et al., 2023 | Strawberry | Agrogain (﻿Sea6 Energy Pvt. Ltd., India) | 0.75, 1.0, and 1.25 mL L⁻¹ at pre-flowering (PFS), fruit set (FSS), and both stages; water spray used as control. | Foliar | Field | ↑plant spread, leaf area in 1.25ml L-1 at both stages (PFS and FSS); ↑number of crowns per plant in 1.0 ml L-1 at both stages (PFS and FSS). | Carbohydrates 50%; 1-3% lipids; 7-38% minerals; protein 10-47%. |
| Rasouli et al., 2023 | *Foeniculum vulgare* L. | ﻿MAX Sailor (﻿CITYMAX company, Xian, China). | ﻿0, 0.5, 1.5, and 3 g L−1. | Foliar | Green house | ↑plant height, leaf number, leaf dry weight, thousand seed weight, chlorophyll a, chlorophyll b, total chlorophyll, carotenoids, total soluble proteins, total soluble carbohydrates, total antioxidant enzymes activity, essential oil content, macro and micronutrients in shoot and root (N, P, K, Fe, and Mn) with seaweed application. | ﻿Organic acid (50%); alginic acid (16%); P (16%); amino acid (16%); N (1%); mannitol (3%); gibberellic acid (300 ppm); auxin (0–20 ppm); cytokinin (0–30 ppm); and pH 9–11. |
| Santos et al., 2024 | Radish | *Calliblepharis jubata* (CJ); Ulasco (UA); Grasco (GR); AgriAlgae-Original Foliar (AA). | ﻿UA 12%, CJ 5%, GR 10% and AA 0.3% (v/v). | Foliar | Field | ↑﻿vertical diameter (from top to the bottom of the root along the vertical axis) in UA and CJ application.  ↓﻿moisture of radish roots in AA application.  ↑protein of radish roots in CJ application.  ↑antioxidants of radish roots in UA, CJ, and GR application. | UA (mg L−1): Ca 440.8; Mg 346.75; Na 1439.5; K 1044; Fe 3.82; Zn 2.38; Mn 4.21; Cu 0.74; P 62.67; N 215.23.  CJ (mg L−1): Ca 277.15; Mg 106.5; Na 1652.5; K 1429.5; Fe 3.02; Zn 6.57; Mn 0.83; Cu 1.57; P 27.84; N 194.23.  GR (mg L−1): Ca 311.7; Mg 309.25; Na 1439.5; K 1183; Fe 5.06; Zn 3.08; Mn 4.53; Cu 0.85; P 47.92; N 199.48.  AA (mg L−1): Ca 447.39; Mg 380.5; Na 953; K 3301.25; Fe 50.85; Zn 5.25; Mn 3.11; Cu 1.17; P 513.26; N 10925.49. |
| ﻿Seğmen et al., 2023 | Pepper | *﻿﻿A. nodosum* (﻿Blue Fresh, Ouragro S. L. company) | ﻿0, 2000 ppm, 4000 ppm, and 6000 ppm. | Foliar | Green house | ↑stem diameter in 2000 ppm application.  ↑vitamin C in 4000 ppm application.  ↓total phenolic in 2000 ppm application.  ↓stem diameter and total soluble sugars in 4000 ppm application.  ↓﻿stem diameter, total soluble sugars, total phenolic, and ß-Carotene in 6000 ppm application. | Organic matter 30%; alginic acid 0.6%; water soluble potassium oxide K2O 8%; pH range 7-9. |
| Shakya et al., 2023 | Strawberry | ﻿*Ascophylum nodosoum* (﻿Phylgreen® and ActyseiTM). | 3 mL L−1 | Soil drench | Green House | ↑root fresh weight under Phylgreen® application.  ↑longest leaf, leaf area, leaf fresh weight, and leaf dry weight under ActyseiTM application.  ↓root fresh weight under ActyseiTM application. | Phylgreen®: 1.2% w/w mannitol; 2% w/w alginic acid; dry matter 15% ﻿w/w; and dry matter from seaweed extract ﻿16.5% w/v.  ActyseiTM: 0.7% mannitol; 2% glycine; 1% organic N; 1% P; and 8% K. |
| Shang et al., 2023b | Tomato | Laminaria | 0 and 2%. | Soil amendment | Green house | ↑plant height, root length, shoot fresh biomass in waste seaweed compost application. | ﻿Moisture content of 81.56%; pH of 6.45; EC of 1.67 dS/﻿m; C of 24.00%; N of 1.42%; C/N ratio of 16.88; P of 0.34%; K of 4.75%; Ca of 2.35%; Mg of 1.39%; and Na of 4.89%. |
| Shukla et al., 2023 | Common bean | *﻿K. alvarezii* (LBS6, ﻿Sea6 Energy Private Limited) | 0-, 0.5-, and 1-ml L−1. | Root drench | Green house | ↑plant height, the number of flowers, chlorophyll b, amino acids, SPAD, linear electron flow, Fv’/Fm’, and Phi2 in all seaweed applications.  ↑fresh weight, dry biomass, and total N in 1 ml L−1. | The chemical composition of LBS06 includes 23% dry matter, <0.100% total nitrogen, 0.04% phosphorus (P₂O₅), 7.07% water-soluble potassium (K₂O), 0.29% magnesium (MgO), 0.43% calcium (CaO), 0.81% total sulphur, 1.13% sodium, 6.35 mg kg−1 zinc, 22.1 mg kg−1 boron, and a pH of 4. |
| Sivakumar et al., 2024 | ﻿*Arachis hypogaea* L. | *﻿Chaetomorpha aerea* | ﻿1 g pot−1 (20%), 2 g pot−1 (40%), 3 g pot−1 (60%), 4 g pot−1 (80%), and 5 g pot−1 (100%). | Soil amendment | Field | ↑total number of leaves with 1 g pot−1.  ↑root length, root branches, seed germination, number of lateral root branches, and total number of shoot branches with 2 g pot−1.  ↑shoot length with 3 g pot−1.  ↑plant height, with 5 g pot−1. | ﻿O (6.82%); C (5.67%); S (0.34%); Cl (0.31%); Mg (0.34%); Na (0.35%); K (0.25%); N (1.56%); Ca (0.06%); Mo (0.08%); Fe (0.04%); Cu (005%); Mn (0.04%); Zn (0.04%); and Co (0.04%). |
| Unal et al., 2023 | Tomato | *﻿Stypopodium schimperi* | ﻿Distilled water (control), 0.5%, 1%, 3%, 5%, and 10%. | Seed priming (in vitro) | Growth chamber | ↑﻿shoot length in 1% seaweed application.  ↑seedling vigor index, shoot length in 0.5% seaweed application.  ↓﻿germination rate in 3% and 5% seaweed application. | 10% doses: pH 6.24; P 22.913 ﻿μg L−1; Mg 1136.57 ﻿﻿μg L−1; K 3777.72 ﻿﻿μg L−1; Na 716.29 ﻿μg L−1; Ca 254.07 ﻿﻿μg L−1; Si 8.17 ﻿﻿μg L−1; Mn 0.26 ﻿﻿μg L−1; Co 0.04 ﻿﻿μg L−1; Mo 15.91 ﻿﻿μg L−1; B ﻿0.39 ﻿﻿μg L−1; Fe 0.2 ﻿μg L−1; Cu 0.25 ﻿﻿μg L−1; Zn 0.17 ﻿﻿μg L−1; Se 15.91 ﻿﻿μg L−1; Protein 6.9%; Carbohydrate 8.47 %; Phenolic 12.27%, Vitamin C 4.6%; EC 5.75 ﻿dS/m. |
| van Tol de Castro et al., 2023 | Rice | ﻿*K.alvarezii* | ﻿Foliar application (5 %, 10 %, 15 %, 20 % and 25 %) and root application (1 %, 2 %, 3 %, 5 % and 10 %). | Foliar and root. | Green house | ↑﻿dry biomass in roots, sheaths and leaves and a greater root number, area and diameter with 10% foliar application of seaweed extract.  ↑biomasses of the roots, sheaths and leaves with 2% and 3% root application of seaweed extract. | ﻿C 2.825 %; H 1.53%; N 0.29%; C:N 11.364; Fe3+ 0.0395 g kg−1; Mn2+ 0.007 g kg−1; Zn2+ 0.0313 g kg−1; Cu2+ 0.0058 g kg−1; Ca2+ 4.35 g kg−1; Mg2+ 5.36 g kg−1; K+ 450 g kg−1; P 2.52 g kg−1; Na+ 3.5 g kg−1. |
| Yuan and Dickinson, 2024 | ﻿*Antirrhinum majus* L. | *﻿*﻿*A. nodosum* (Fertile Field Ltd., New Plymouth, New Zealand). Analyses | ﻿0.1, 0.25, 0.5, 1, and 10 g L−1. | Foliar | Field | ↑leaf number, root dry mass per gram, relative water content with 0.1 g L−1 application.  ↑leaf number and root dry mass per gram with 0.25 g L−1 application.  ↑leaf number, root dry mass per gram, and relative water content with 0.5 g L−1 application. | C 29.97%; N 5.41%; P 12500 ﻿µg g−1; K 107100 ﻿µg g−1; Ca 10800 ﻿µg g−1; Mg 936 ﻿µg g−1; S 12500 ﻿µg g−1; Fe 3310 ﻿µg g−1; Mn 57 ﻿µg g−1; Zn 558 ﻿µg g−1; Cu 523 ﻿µg g−1; B 944 ﻿µg g−1; and Mo 8 ﻿µg g−1. |

**Table S2. Summary of 28 studies in the impact of seaweed-based biostimulants and biofertilizers on crop yield and productivity.**

| **Author (Year)** | **Plant Species** | **Seaweed Type / Biostimulant products** | **Treatment Details** | **Yields Improved** | **Physico-chemical Composition** |
| --- | --- | --- | --- | --- | --- |
| Abdel-Sattar et al., 2024 | Mango | *﻿A. nodsoum* | 6 L ha−1 applied by irrigation in orchard. | ↑yield, fruit weight, pulp weight; pulp/fruit, fruit length, fruit width, fruit shape index, vitamin C, total soluble solids (TSS), and TSS/acidity ratio with seaweed application.  ↓seed weight, peel weight, acidity content with seaweed application. | ﻿10.58% organic materials (i.e., cytokinins, auxins, betaines, gibberellin, etc.); macroelements (0.7% N, 1.5% P, 6% K, 0.02% Ca, 0.23% S, and 0.04% Mg); microelements (20–50 ppm Fe, 1–5 ppm Cu, 5–15 ppm Zn, 1–5 ppm Mn, and 20–30 ppm B); 7% carbohydrates (alginic acid, mannitol, and laminarin); and 0.1% amino acids. |
| Ahmed et al., 2024 | Tomato | *A. nodosum* (Amino Seaweed, SV Group, Bangkok, Thailand) | ﻿0, 25, 50, 75, and 100% of 5 ml L−1 applied by soil drench in polyhouse. | ↑fruit yield, fruit number per plant, total water input, water productivity, fruit length, fruit width, total soluble solids (﻿°Brix), fruit firmness, color index, and fruit pH. | ﻿44% organic matter; more than 13% alginic acid; 2.1% total N; 2.7% P; 15.9% K; a minor amount of amino acid; vitamins; and minerals. |
| Al-Saif et al., 2023 | Apricot (*Prunus armeniaca*) | Qingdao Haidelong Biotechnology Co., Ltd., Qingdao, China. | ﻿1000, 2000, and 3000 mg L−1 applied by foliar in field. | ↑fruit set, fruit yields per tree, and fruit yield per hectare, fruit weight, fruit size, fruit length, fruit diameter, fruit firmness, ﻿total soluble solids, vitamin C, ﻿total sugars, reduced sugars, and non-reduced sugars in 2000, and 3000 mg L−1 application.  ↓total acidity in 2000, and 3000 mg L−1 application. | alginic acid 16%; organic matter 50%; N 1%; K2O 16–21; cytokinin and gibberellin 600–800 mg L−1; mannitol 1–6%; Fe 0.2%; Ca 0.15%; Mg 0.2%; S 1%. |
| Alebidi and Abdel-Sattar, 2024 | Orange | *﻿*Qingdao Haidelong Biotechnology Co., Ltd., Qingdao, China. | ﻿0, 5, and 10 g L−1 applied by foliar in orchad. | ﻿↑physical characteristics (fruit weight, peel weight, pulp weight, fruit volume, fruit length, fruit diameter, and juice volume) under all seaweeds application. | Cytokinin and gibberellin 600–800 mg L−1; alginic acid 16%; mannitol 1–6%; organic matter 50%; N 1%; K2O 16–21%; Fe 0.2%; Ca 0.15%; Mg 0.2%; and S 1%. |
| Ali et al., 2023 | Quinoa ﻿(*Chenopodium quinoa* Willd.) | *﻿Ulva* spand *A.* sp. (SEAGREEN®, ﻿Agro Chemicals Lafortaleza Yesosy Escatolas, Ctra Pique, Spain, imported and distributed by El Masria Co. for Fertilizers and Trade, El-Noubaria region, Beheira Governorate, Egypt; http://www. masriafert.com). | ﻿0 (control), 1.5- and 3.0-ml L−1 applied by foliar in field. | ↑grain yield per plant, total grain yield, weight of 1000-grains, grain size in the second season, mineral contents in quinoa grains (N, P, K, Ca, Fe, Zn, and Mn), crude protein, crude fat, crude fiber, ash, dry matter, and total carbohydrates with increasing seaweed application. | ﻿N 4%; P 6%; K 6%; Ca 1.10%; Mg 0.95%; Fe 0.078%; Zn 0.18%; Mn 0.057%; Cu 0.17%; and potassium alginate 15%. |
| Amato et al., 2024 | Oregano plants | *﻿﻿A. nodosum* (Acadian® MPE, Acadian Sea plants Lte, Dartmouth, NS, Canada). | 1 g L−1 applied by foliar in field. | ↑inflorescences+Leaves fresh yield and inflorescences+leaves dry yield under seaweed application.  ↓essential oil yield under seaweed application. | ﻿Organic N 1%; potassium oxide (K2O) 19%; betaines 0.1%; mannitol 4%; total organic C of biological origin 20 %. |
| Cano-Benitez et al., 2024 | Avocado | ﻿*A. nodosum* | ﻿0-, 2.5-, 5-, and 7.5-ml L−1 applied by foliar and soil drench in shade house. | ↑fruit yield in ≥5 ml L−1 at 20 weeks after the start of treatment (WAT) for adult trees. | ﻿pH range 8–10; organic matter range 14.5–17.5% w/w; K 4% w/w; and K2O 4.8% w/w. |
| Consentino et al., 2023a | Strawberry | ﻿﻿*E. maxima* (Kelpstar®, Mugavero fertilizers, Palermo, Italy). | 0 and 3 L m−2 applied by foliar field. | ↑total yield, marketable yield, ﻿CIELab parameters (a* and L*), firmness, soluble solid content, ascorbic acid, phenolic concentration, anthocyanins, and mineral concentrations of fruits (N, K and Mg) under seaweed application. | Organic N 1%; organic C 10%; auxyn 11 mg L−1; cytokinin 0.03 mg L−1; ﻿and organic substances (weight < 50 kDa) (30%). |
| Consentino et al., 2023b | Basil | Kelpstar | 0.5 L m−2 applied by foliar in field. | ↑yield 17.46% under seaweed application. | Organic N 1%; organic C 10%; Auxyn 11 mg L−1; Cytokinin 0.03 mg L−1. |
| Cortiello et al., 2024 | Potato | *﻿*Fitostim® Alga | 150 g hL−1 applied by foliar in field. | ↓quality analysis of tubers (glucose and fructose) under seaweed application. | ﻿Organic N 2%; organic C 10%; and organic matter 50% < 50 kD. |
| El-Ziat et al., 2024 | French Marigold | ﻿Algeser (Shoura Chemicals Company, Cairo, Egypt) | ﻿2.0, 4.0-, and 6.0-ml L−1 applied by foliar in green house. | ↑flowers number per plant, flower fresh weight per plant, and flower dry weight per plant under seaweed application.  ↑essential oil under all seaweed application. | N 1–1.5%; P 0.02–0.09%; S 3−9%; K 1–1.2%; Ca 02−1.5%; Mg 0.5–0.9%; Zn 10–100 mg L−1; Mn 5–12 mg L−1; Fe 50–200 mg L−1; B 20–100 mg L−1; Cu 1–6 mg L−1; Mo 1–5 mg L−1; etc. |
| Engel et al., 2023 | Soybean | *A. nodosum* (Acadian Plant Health™). | 0.25 and 0.50% applied by foliar in green house. | ↑number of nodes per plant, pods per plant, pods dry weight per plant, seed per plant, seeds dry weight per plant, and individual seed dry weight in 0.50% application.  ↑ pods per plant, pods dry weight per plant, seed per plant, seeds dry weight per plant, and individual seed dry weight in 0.25% application. | N 8.12 g kg−1; P 6.82 g kg−1; K 12.00 g kg−1; Ca 1.60 g kg−1; Mg 2.03 g kg−1; S 8.16 g kg−1; B 5.74 mg kg−1; Cu 13.60 mg kg−1; Fe 11.5 mg kg−1; Mn 0.04 mg kg−1; Zn 24.40 mg kg−1; Na 20 mg kg−1; water-soluble K₂O 61.48 g L−1; total organic carbon 69.60 g L−1; density 1.16 g dm−3. |
| Farruggia et al., 2024b | ﻿Sage (*Salvia officinalis* L.) | *﻿E. maxima* (EM) and ﻿*A. nodosum* (AN) by ﻿Mugavero fertilizers company. | 6 L ha−1 applied by foliar in field. | ↑essential yield content under EM application.  ↑essential oil content in first year, and essential oil yield under AN application. | EM: ﻿organic N 1%; organic C 10%; auxin 11 ml l−1; cytokinin 0.03 mg l−1; and organic substances with nominal molecular weights< 50 kDa (30%).  AN: ﻿organic N 1%; organic C 10%; and phytohormones and organic substances with nominal molecular weights< 50 kDa (30%). |
| Galal et al., 2024 | Orange | ﻿*U. flexusoa* (UF); *Enteromorpha intestinalis* (EI); and *Griffithsia teges* (GT). | 0, 5, 10, and 15% applied by foliar in field. | UE: ↑fruit weight, length, and width in 15% treatment; ↓total soluble solids in 15% treatment.  EI: ↓total soluble solids in 15% treatment.  GT: ↑total soluble solids in 15% treatment. | UF: P 7.33 mg kg−1; K 7.79 mg kg−1; Ca 105.3 mg kg−1; Mg 49.8 mg kg−1; Mn 14.4 mg kg−1; Cu 5.74 mg kg−1; Zn 11.9 mg kg−1; Fe 6.1 mg kg−1; Na 148.1 mg kg−1.  EI: P 10.88 mg kg−1; K 9.95 mg kg−1; Ca 100.4 mg kg−1; Mg 20.7 mg kg−1; Mn 16.3 mg kg−1; Cu 2.23 mg kg−1; Zn 5.77 mg kg−1; Fe 5.3 mg kg−1; Na 107 mg kg−1.  GT: P 10.64 mg kg−1; K 6.93 mg kg−1; Ca 60.9 mg kg−1; Mg 28.4 mg kg−1; Mn 18.2 mg kg−1; Cu 11.1 mg kg−1; Zn 7.84 mg kg−1; Fe 12.7 mg kg−1; Na 106.1 mg kg−1. |
| Gandhi et al., 2024 | Corn | ﻿*K. alvarezii* (KAE), ﻿*G. debilis* (GDE), and ﻿*S. cinctum* (SCE). | ﻿0, 2.5, 5, 7.5, 10, 12.5 or 15% applied by foliar in field. | ↑grain yield with 7.5%, N grains, protein content, Cu and B contents in the grains, and carbohydrate content in grains with all seaweed types of application. | KAE: K 31.2%; Fe 149.6 mg kg−1; indole acetic acid (IAA) 5.1 mg L−1; ﻿zeatin 10 mg L−1; gibberellic acid (GA3) 25.3 mg L−1; ﻿total phenols 1583 ﻿mg GA (100g) −1; flavonoids ﻿83 mg QE (100g) −1; etc.  GDE: K 27.3%; Fe 144.5 mg kg−1; indole acetic acid (IAA) 3 mg L−1; ﻿zeatin 22.7 mg L−1; gibberellic acid (GA3) 22.3 mg L−1; ﻿total phenols 1381 ﻿mg GA (100g) −1; flavonoids ﻿72.2 mg QE (100g) −1; etc.  SCE: K 27.3%; Fe 146.9 mg kg−1; indole acetic acid (IAA) 9.8 mg L−1; ﻿zeatin 10.4 mg L−1; gibberellic acid (GA3) 3.6 mg L−1; ﻿total phenols 1438 ﻿mg GA (100g) −1; flavonoids ﻿75.1 mg QE (100g) −1; etc. |
| Jesus et al., 2024 | Soybean | *A. nodosum* (﻿Brandon Bioscience, Tralee, Ireland). | Combination of the biostimulant dose (0.5, 1.0 and 1.5 L ha−1) and application timings, applied by foliar in green house. | ↑number of pods, number of grains per pod, weight of a thousand seeds, and grain yield with ﻿*A. nodosum*-based biostimulant at 1.5 L ha−1 application (0.75 L ha−1 at Vegetative 4 + 0.75 L ha−1 at Reproductive 1). | Ash (35.81 ± 0.87% w/w); total carbohydrates  (63.52 ± 0.55% w/w); polyphenols (0.55 ± 0.06% w/w); other  organic compounds (0.12 ± 0.03% w/w); and low macronutrients content with N (0.3–0.4% w/w), P (0.1–0.2% w/w)  and K (2–3% w/w). |
| Karthik and Jayasri, 2023 | Mung bean | *﻿P. hornemannii* | ﻿0 and 30% applied by seed soaking and foliar in green house. | ↑grains (85%) with seaweed application. | ﻿N 10500 mg kg−1; P 700 mg kg−1; K 9300 mg kg−1; Ca 35000 mg kg−1; Mg 7100 mg kg−1; Na 2600 mg kg−1; Fe 1300.55 mg kg−1; Mn 165.86 mg kg−1; Zn 24.18 mg kg−1; Cu 20.74 mg kg−1. |
| Kumar et al., 2023 | Ground nut | ﻿*H. macroloba* | No fertilizer (control), 25% (2g kg−1); 50% (4 g kg−1); 75% (6 g kg−1); 100% (8 g kg−1) applied by soil drench in field. | ↑pods number, weight of pods, seeds number, and weight of seeds, ﻿chemical traits include refractive index (40 °C), saponification value, iodine value (Wijs), acid value, unsaponifiable matter, bellier turbidity, free fatty acid, and extracted oil. | 3771 mg per 100 g of Ca. |
| Lopes et al., 2024 | Blueberry (Duke and Draper cultivars) | *E. maxima* (﻿Kelpak®) | 0, 2, and 4 L ha−1 applied by foliar in field. | ↑yield with 4 L ha−1 seaweed application in Draper cultivar.  ↑weight and dimensions of bluberries with 4 L ha−1 seaweed application in Duke cultivar.  ↑firmer with all seaweed application in Duke cultivar.  ↑total organic acid content with 2 L ha−1 seaweed application in Draper and Duke. | 0.55% K2O (﻿w/w); pH 4.4; conductivity 20 ﻿mS/cm. |
| Marey and Elmasry, 2024 | Onion | ﻿Stimu grow seaweed extract (Queisna comp. Egypt). | 0.5 g L−1 applied by foliar in field. | ↑average bulb weight, bolters, bulb diameter, total soluble sugars, dry matter, NPK percentage of onion blubs, carbohydrate, and protein in two years with seaweed application.  ↑marketable bulb yield, total bulb yield, and double bulbs in second year with seaweed application. | K2O 18%; CaO 0.5−2%; MgO 0.5−2%; Fe 0.15−0.3%; Cu 0.30−0.45%; alganic acids 8−9%; amino acids 5%; and 45−55% plant growth regulators. |
| Mattner et al., 2023 | Strawberry | *Durvillea potatorum* and *A. nodosum* (Seasol®; Seasol International, Bayswater, Victoria, Australia). | 1:400 dilution; 10 L ha⁻¹ drench monthly + foliar spray to runoff applied by combination of soil drench and foliar in field. | ↑yield in short and long season crop with seaweed application. | pH 10.5; N 0.2 % (w/v); P 0.02%; K 3.7%; S 0.3 %; Ca 458 mg L−1; Mg 972 mg L−1; Fe 115 mg L−1; Mn 2 mg L−1; B 15 mg L−1; Zn 5 mg L−1. |
| Ntanasi et al., 2024 | Tomato | *﻿A. nodosum* (﻿Algastar® Mugavero fertilizers, Termini Imerese, Italy). | ﻿2 ml L⁻¹applied by foliar in green house. | ↑fruit numbers per plant, fruit diameter, total soluble solids content, and fruit firmness with seaweed application in Tomataki variety.  ↑fruit numbers per plant, mean fruit weight, fruit diameter, and total soluble solids content with seaweed application in Thessaloniki variety. | ﻿1% total organic N; 10% total organic; 30% total organic substance, with nominal molecular weight <50 kDa. |
| Rana et al., 2023 | Strawberry | Agrogain (﻿Sea6 Energy Pvt. Ltd., India) | - ﻿0.75 ml L⁻¹ at pre flowering stage (PFS) - 1.0 ml L⁻¹ at PFS - 1.25 ml L⁻¹ at PFS - 0.75 ml L⁻¹ at fruit set stage (FSS) - 1.0 ml L⁻¹ at FSS - 1.25 ml L⁻¹ at FSS - 0.75 ml L⁻¹ at PFS and FSS - 1.0 ml L⁻¹ at PFS and FSS - 1.25 ml L⁻¹ at PFS and FSS - water spray (control) - All treatment applied by foliar in field. | ↑percent fruit set in 1.25 ml L⁻¹ at the PFS and FSS (Camarosa variety).  ↑yield per plant in 1.0 ml L⁻¹ at PFS and FSS (Winter Dawn variety).  ↑yield efficiency in 1.0 ml L⁻¹ at FSS (Winter Dawn variety).  ↑fruit weight in 1.25 ml L⁻¹ at PFS and FSS (Winter Dawn variety).  ↑shape index in 1.25 ml L⁻¹ at FSS (Chandler variety).  ↑total soluble solids (TSS) in 1.25 ml L⁻¹ at PFS and FSS (Chandler variety).  ↑anthocyanin content in 1.25 ml L⁻¹ at PFS (Camarosa variety). | Carbohydrates 50%; 1−3% lipids; 7−38% minerals; protein 10−47%. |
| Samuels et al., 2024 | Common Grape Vine (*Vitis vinifera* L.) | *﻿E. maxima* (Kelpak®) | 1:500 applied by foliar in field. | ↑pruning weights, post-harvest leaf area, seed number and seed weights, elongated grape bunches, total soluble sugars at harvest, sugar accumulation, glucose, fructose concentrations, anthocyanin, tannin, total phenolic index, color density, and fresh weight with seaweed application. | Ca 107.83 mg L-1; K 4079.75 mg L-1; 176.95 mg L-1; P 99.07 mg L-1; N 20.21%; C 51.82%; H 4.87%; S 11.93%; some hormones and amino acids. |
| ﻿Seğmen et al., 2023 | Pepper | *﻿﻿A. nodosum* (﻿Blue Fresh, Ouragro S. L. company) | ﻿2000 ppm, 4000 ppm, and 6000 ppm applied by foliar in green house. | ↑yield and fruit number in all seaweed application.  ↑average fruit wheat in 6000 ppm seaweed application.  ↓average fruit weight in 2000 ppm seaweed application.  ↑fruit width and length in 4000 and 6000 ppm seaweed application. | Organic matter 30%; alginic acid 0.6%; water soluble potassium oxide K2O 8%; pH range 7−9. |
| Shakya et al., 2023 | Strawberry | ﻿*Ascophylum nodosoum* (﻿Phylgreen® and ActyseiTM). | 3 mL L−1 applied by soil drench in green house. | ↓fruit width under ActyseiTM application.  ↓ fruit width under Phylgreen® application.  ↑number of flowers and fruits under all seaweed treatments (Phylgreen® and ActyseiTM). | Phylgreen®:1.2% w/w mannitol; 2% w/w alginic acid; dry matter 15% ﻿w/w; and dry matter from seaweed extract ﻿16.5% w/v.  ActyseiTM: 0.7% mannitol; 2% glycine; 1% organic N; 1% P; and 8% K. |
| Vinothkumar et al., 2024 | Tomato | *K. alvarezii* | 5% and 10% applied by foliar in green house. | ↑﻿moisture, protein, fiber, and carbohydrate content, mineral nutrients (Ca, Mg, K, Fe, and Zn), antioxidants (vitamin C, carotenoids, and lycopene content), total soluble solids, titrable acidity, taste index, and fruit firmness with 10% seaweed application.  ↓antinutritional factors (phytates, oxalates, and tannins) with 10% seaweed application. | Cow urine-extracted seaweed: pH 8.47; EC 53.20 dS m−1; Ca 110.10 mg kg−1; Mg 960.0 mg kg−1; K 18300 mg kg−1; Fe 97.5 mg kg−1; Zn 6.20 mg kg−1.  Water-extracted seaweed: pH 5.91, EC 2.97 dS m−1; Ca 30.10 mg kg−1; Mg 100.12 mg kg−1; K 1240 mg kg−1; Fe 5.5 mg kg−1; and Zn 0.20 mg kg−1. |
| Zamljen et al., 2024 | Cucumber | ﻿﻿*A. nodosum*: Phylgreen® (Trade Corporation International, Madrid, Spain) and Fitostim® Algae ﻿(SCAM SpA, Modena, Italy). | Phylgreen®: 0.15%−0.3%. Fitostim® Algae: 0.2%−0.3% applied by foliar in green house. | ↑fruit brightness parameter (L*) with all seaweed application.  ↓﻿total yield and total number of fruits with all seaweed application.  ↑dry weight at first harvest in Fitostim® application. | Phylgreen®: 15% dry matter; 0.2% N; 0.05% P2O5; 0.4% K2O; 8% C; 1.2% mannitol.  Fitostim® Algae: 2% N; 10% C; 50% organic compounds with molecular weight greater than 50 kDa. |

**Table S3. Summary of 19 studies in seaweed-based biostimulants and biofertilizers roles in enhancing tolerance to abiotic stress.**

| **Author (Year)** | **Plant Species** | **Seaweed Type and doses** | **Stress Factor** | **Parameter response** | **Biostimulant Characteristics** |
| --- | --- | --- | --- | --- | --- |
| Akhbarfar et al., 2023 | Plantain trees (﻿old tree or OT and a young tree or YT). | *A. nodosum* L. (﻿Stimplex® Crop, Acadian Seaplants, Nova Scotia, Canada). Doses: ﻿0% (control or A0), 1.5% (A1), and 3.0% (A2) (v/v). | Drought stress levels: ﻿100% field capacity (FC) (D100), 75% FC (D75); and 50% FC (D50). | ↑chlorophyll content, ﻿net assimilation rate, ﻿relative water content, leaf Fe, antioxidant enzymes activity with 3% application of seaweed extract under drought stress. | Cytokinin 0.01%; total N 0.1%; phosphoric acid 0.05%; soluble K 4.2%; Fe 25%; Mg 0.1%, B 16%; and Ca 0.06%. |
| Alasvandyari et al., 2024 | ﻿Corn | *﻿S. boveanum* (0.0%, 1.0%, 1.5%, 2.0%, and 2.5% V/V). | ﻿Drought stress: ﻿non-stress 80% of field capacity (FC), 60% FC, and 40% FC. | ↑shoot dry weight, superoxidase dismutase, proline content, soluble sugar content, and relative water content with 1.5% seaweed application under all drought stress.  ↓malondialdehyde levels with 1.5% seaweed application under all drought stress. | C 29.97%; N 5.41%; P 12500 ﻿µg g−1; K 107100 ﻿µg g−1; Ca 10800 ﻿µg g−1; Mg 936 ﻿µg g−1; S 12500 ﻿µg g−1; Fe 3310 ﻿µg g−1; Mn 57 ﻿µg g−1; Zn 558 ﻿µg g−1; Cu 523 ﻿µg g−1; B 944 ﻿µg g−1; and Mo 8 ﻿µg g−1. |
| Ali et al., 2024 | Tomato | ﻿Acadian Sea Plants, NS, Canada (﻿0.5% v/v, 6 h before the initiation of the drought treatments while control plants were foliar treated with water). | Drought: 100% Field Capacity or FC (well-watered -WW) receiving 150 mL; 50% FC (mild stress- MS) receiving 75 mL; 25% FC (severe stress- SS) receiving 37.5 mL. | ﻿↑antioxidant enzyme activities (﻿catalase-CAT), ascorbate peroxidase-APX, guaiacol peroxidase-GPX, superox- ide dismutase-SOD, glycine betaine (GB), and proline), stomatal conductance, chlorophyll content, shoot dry weight, root dry weight, relative water content, plant height, and yield with seaweed application under well-watered.  ↑chlorophyll content, shoot dry weight, and root dry weight with seaweed application under mild stress water.  ﻿↑chlorophyll fluorescence (Fq′/Fm′), chlorophyll content, shoot dry weight, root dry weight, relative water content, plant height, and yield with seaweed application under severe stress. | protein/amino acids 3–6%; lipid 1%; alginic acid 12–18%; fucose-containing polymers 12–15%; mannitol 5–6%; other carbohydrates 10–20%; N 0.1%; P 0.0%; K 2.5%. |
| da Silva et al., 2024 | Soybean | FH Attivus (﻿*A. nodosum* 64%, 25 g pot−1) | Salinity (﻿electrical conductivity of the irrigation water (ECw) 0.5 dS m−1; and ECw 5.0 dS m−1). | ↑biomass production, plant height, leaf area, stomatal conductance, photosynthetic rates with seaweed application under saline stress. | N 2.0%; Mg 1.0%; S 3.6%; B 0.1%; Fe 0.05%; Mn 0.1%; Mo 0.1%; Cu 0.04%; Zn 0.2%; *A. nodosum* 64%; fulvic acid 6.5%. |
| El Boukhari et al., 2023 | ﻿Faba bean | *Fucus spiralis* (FSE), *U. lactuca* (ULE), *Laminaria ochroleuca* (LOE), and *A. nodosum* (ANE) from Stella Maris, Acadian Plant Health. All treatments applied as a soil drench 22 days after sowing or DAS (100 mL pot−1), and second application was done as a foliar spray (10 mL plant−1) one day before applying the drought stress regime (40 DAS). Third application was done as a foliar spray (10 mL plant−1) 51 DAS. | Drought stress (10 days, from 41 to 50 DAS). | ↑dry weight, proline, in FSE application during drought stress.  ↑dry weight, proline, in ANE application during drought stress.  ↑hydrogen peroxide in ULE application recovery phase.  ↓﻿photosynthetic performance index (﻿PIabs) in FSE application during drought stress.  ↓﻿malondialdehyde in LOE application during drought stress. | ANE: sugars 163.6 ﻿mg Glucose.g−1 DW; total phenols 17.08 ﻿mg GAE.g−1 DW; proteins 48.8 ﻿mg BSA.g−1 DW; proline: 2.27 ﻿mg proline.g−1 DW; solids 320 mg.mL−1.  FSE: 222.52 mg Glucose.g−1 DW; total phenols 43.23 ﻿mg GAE.g−1 DW; proteins 178.06 ﻿mg BSA.g−1 DW; proline: 2.27 ﻿mg proline.g−1 DW; solids 39.5 mg.mL−1.  LOE: 46.06 mg Glucose.g−1 DW; total phenols 3 ﻿mg GAE.g−1 DW; proteins 120.28 ﻿mg BSA.g−1 DW; proline: 2.46 ﻿mg proline.g−1 DW; solids 48 mg.mL−1.  ULE: 376.69 mg Glucose.g−1 DW; total phenols 6.85 ﻿mg GAE.g−1 DW; proteins 136.02 ﻿mg BSA.g−1 DW; proline: 17.81 ﻿mg proline.g−1 DW; solids 50.5 mg.mL−1. |
| Fozi et al., 2024 | Licorice | ﻿*A. nodosum (SWE:* 0, 5, and 10 g L−1); foliar. | Drought; ﻿100% (control), 80% (slight stress), 60% (mild stress), 40% (moderate stress), and 20% (severe stress) of field capacity (FC). | ↑glycyrrhizic acid content with the intensification of drought stress (except 20%) and seaweed levels.  ↑glabridin in the severe drought stress condition (20%) in SWE 10 g L−1.  ↑total phenolic and flavonoid content under severe drought stress in SWE 10 g L−1.  ↑POD activity under mild to severe stress in SWE 10 g L−1.  ↑SOD activity under severe stress in SWE 10 g L−1.  ↓﻿proline content under moderate to mild stress in SWE 5 and 10 g L−1. | Total water-soluble N 2%; available phosphoric acid (P2O5) 3%; soluble potash 22%; amino-acid-free 8%; alginic acid 14.6%; and mannitol 4%. |
| Gul et al., 2024 | Corn | ﻿*Iyengaria stellata* (IS) (6 g kg−1 of soil), *Colpomenia sinuosa* (CS) (6 g kg−1 of soil), and combination of IS and CS (ISCS). | Salinity (0, 100, and 200 mM NaCl) | ↑shoot and root length under all salinity stress in ISCS application.  ↓﻿root fresh and dry weights under 200 mM NaCl in ISCS application.  ↓﻿root dry weight under 100 mM NaCl in ISCS application.  ↑﻿root fresh weight under 100 mM NaCl in ISCS application.  ↑root mass fraction under all salinity stress in IS, CS, and ISCS application.  ↑shoot length under 100 mM NaCl in IS, CS, and ISCS application.  ↑electrolyte leakage under all salinity stress in IS, CS, and ISCS application.  ↑carbohydrate contents in the root and shoot under all salinity stress in ISCS application.  ↑phenols under all salinity stress in ISCS application.  ↑Na and K under 200 mM NaCl with ISCS application. | IS: pH 7.94; total dissolved salt 13500 mg L−1; EH/URD 14 mv; hardness 2100 mg L−1; Ca 29 mg L−1; bicarbonates 350 mg L−1; nitrates 50.14 mg L−1; sulphate 68.12 mg L−1.  CS: pH 6.8; total dissolved salt 8080 mg L−1; EH/URD 16 mv; hardness 1400 mg L−1; Ca 14 mg L−1; bicarbonates 400 mg L−1; nitrates 55.80 mg L−1; sulphate 42.14 mg L−1. |
| ﻿Hernández-Herrera et al., 2024 | Tomato | *﻿P. gymnospora* (100 mL at 20, 25, and 30 days after germination). | 100 mL of NaCl solution | ↑﻿Photochemical quantum yield of PSII (Fv/Fm), ﻿chlorophyll (equivalent SPAD units), ﻿total reducing sugars, phenolics, ﻿DPPH and ABTS antioxidant activity, SOD activity, and APX activity.  ↓﻿nonphotochemical quenching (NPQ), proline, flavonoids, and CAT activity. | Macronutrients (%, DW): organic C 0.014, total N 0.019, relationship C/N 0.73, total P <0.0001, P2O5 <0.0001, total K 0.07, K2O 0.08, total Ca 0.0011, total Na 0.538, chlorides 0.0391, sulfates (S-SO4) 0.0327, bicarbonates (HCO3) 0.0049; Micronutrients (%, DW): Fe 0.0002, Zn 0.0001, Cu 0.00001, B 0.00016; etc. |
| Krid et al., 2023 | Tomato | ﻿*Jania rubens* fresh extracts in 2%, 5% and 10% doses application. | ﻿Salinity levels: 0 and 50 mM NaCl. | ↑phosphoenolpyruvate carboxylase activity in root with 2% application of seaweed extract under salinity stress.  ↑phosphoenolpyruvate carboxylase activity in leaves, chlorophyll a, chlorophyll b, and total chlorophyll with 5% application of seaweed extract under salinity stress.  ↑superoxide dismutase activity in the leaves, ﻿glutamate dehydrogenase activity in leaves and root, ﻿glutathione peroxidase activity in leaves, ﻿glutathione S-transferase activity in the leaves, and chlorophyll a with 10% application of seaweed extract under salinity stress.  ↓total free amino acid content with 2% application of seaweed extract under salinity stress.  ↓total soluble sugar content with all applications of seaweed extract under salinity stress. | Polyphenols 0.232 ﻿mg.g−1 FW; flavonoid 0.318﻿ mg.g−1 FW; soluble sugar 3.85 ﻿mg.g−1 FW; and amino acid 0.694. |
| Mannan et al., 2023 | Soybean | ﻿*G. tenuistipitata* var. *liui* (﻿0.0%, 5.0%, and 10.0% v/v). | Drought levels: ﻿well-watered (80% of field capacity (FC) and drought (40% of FC). | ↑﻿plant height, leaf fresh weight (FW), petiole FW, stem FW, total FW, total chlorophyll, relative water content, water saturation deficit, number of pods per plant, number of seeds, 100 seed weight, and seed yield per plant under drought stress with increasing seaweed application. | Mineral elements (﻿mg per 100 g dry weight): P 580.65; Ca 130.64; Mg 3.4; Fe 76.58; Cu 3.89; Pb ﻿0.041 mg kg−1 dry weight; etc. |
| Melo et al., 2024 | Soybean | Megafol®, ﻿Syngenta Biologicals. Normal application ﻿(1.0 L ha−1) and split application 0.5 L ha−1 +0.5 L ha−1). ﻿For split application, the first application was carried out concomitantly with the onset of water deficit, and the second application was carried out five days after the first. | Drought levels: 50% (WD) and 100% (control) soil moisture at field capacity. | ↑net photosynthetic rate, transpiration rate, ﻿carboxylation efficiency, water potential (Ψw), chlorophyll a, chlorophyll b, and total chlorophyll content in WD+biostimulant application.  ↓﻿water use efficiency, and proline content in WD+biostimulant application.  ↑ water use efficiency and water potential (Ψw) in WD+split biostimulant application.  ﻿↓﻿ratio of internal to external concentration of CO2 and proline content in WD+split biostimulant application. | Corg 9.0%; K2O 8.0%; N 3.0%; 78.9% inert ingredients. |
| Ntanasi et al., 2024 | Tomato | *﻿A. nodosum* (﻿2 ml L−1 of Algastar®, Mugavero fertilizers, Termini Imerese, Italy). | ﻿0, 0.5 and 3.0 mM NaCl. | ↑yield or fruit weight per plant (23%) for Tomataki under salinity stress; yield or fruit weight per plant (34%) for Thessaloniki under salinity stress. ﻿  ↑total soluble solids content (TSSC) and titratable acidity (TA) for Tomataki and Thessaloniki varieties under salinity stress.  ↑mean fruit weight and fruit diameter for Tomataki under salinity stress.  ↑mean fruit weight for Thessaloniki under salinity stress.  ↓fruit firmness of Tomataki under salinisty stress.  ↓Na leaves of Tomataki under salinity stress.  ↓K and Na leaves of Thessaloniki under salinity stress. | 1% total organic N; 10% total organic; 30% total organic substance, with nominal molecular weight <50 kDa. |
| Radwan et al., 2023 | Watermelon | ﻿*U. lactuca* (0, 3, 5, and 8%). | Salinity levels: ﻿0, 100, 200, and 300 mM NaCl. | ↑seed germination, ﻿shoot length, root length, number of branches, leaf area, ﻿content of chlorophyll a, chlorophyll b, carotenoids, ﻿superoxide dismutase (SOD), catalase (CAT), and peroxidase (POD) activities with increasing seaweed application in salinity stress. | ﻿0.93 mg g−1 total carbohydrates; 3.01 mg g−1 of lipids; 3.21 mg g−1 protein; glycine betaine 5.13 mg g−1; and total phenolics 0.0188 mg g−1. |
| Sabatino et al., 2023 | Chicory plants | *E. maxima* (﻿0 or 3 mL L−1 of Kelpstar®, Mugavero fertilizers, Italy). | ﻿Drought levels: well-watered (WW), moderate drought stress (MDS) and severe drought stress (SDS). WW, MDS and SDS received 90–100%, 60–70% and 30–40% of water holding capacity, respectively. | ↑number of leaves, total leaf area, total dry biomass, total chlorophyll, total sugars, proline content, total polyphenols, and ascorbic acid with seaweed application under WW condition.  ↑number of leaves, total dry biomass, relative water control, water use efficiency, total chlorophyll, proline content, total polyphenols, and ascorbic acid with seaweed application under MDS condition.  ↑number of leaves, total dry biomass, relative water control, water use efficiency, total chlorophyll, total sugars, proline content, and ascorbic acid with seaweed application under SDS condition.  ↓root-to-shoot ratio and ﻿malondialdehyde content with seaweed application under WW condition.  ↓malondialdehyde content with seaweed application under MDS condition.  ↓root-to-shoot ratio with seaweed application under SDS condition. | Organic N 1%; organic C 10%; auxin 11 mg L−1; cytokinin 0.03 mg L−1; organic substances (< 50 kDa) 30%; and pH 6. |
| Santos et al., 2023 | *Inga edulis* | *﻿A. nodosum* (﻿Acadian®) with 15, 30 and 45 mL L−1. | ﻿Drought levels: ﻿control (daily irrigation, maintaining 70% of the water retention capacity) and drought by water restriction – complete suspension of irrigation. | ↑N content with 45 mL under drought and post-stress.  ↑quantum yield of photosystem II (Fv/Fm) under 30- and 45-mL seaweed application in post stress period.  ↑proline content with all seaweed applications during soil water deficit. | ﻿Water solubility 100%; pH 8.0; organic C 69.60 g L−1; organic matter 13–16%; Total N 0.30–0.60%; available phosphorus (P2O5) = < 0.1%; soluble potassium (K2O) 5.00–7.00; S 0.30–0.60%; Mg 0.05–0.10%; Ca 0.10–0.20%; Fe 30–80 ppm; Cu 1–5 ppm, Zn 5–15 ppm; Mn 1–5 ppm; B 20–50 ppm; carbohydrates (alginic acid, mannitol and fucoidan) and amino acids = 1.01%. |
| Shahzad et al., 2023 | Rice (*Oryza sativa L.*) | ﻿*A. nodosum* (2 mL of Superfifty, BioAtlantis Ltd., Kerry, Ireland) with weekly or biweekly application. | Salinity levels: ﻿0 and 200 mM NaCl. | ↑shoot length, root length, shoot fresh weight, root fresh weight, relative water content, mineral nutrient contents in rice plants (K, Na, Mg, Ca, and K/Na ratio), chlorophyll a, total chlorophyll, carotenoid, net photosynthetic rate, transpiration rate, stomatal conductance, maximum efficiency of photosystem II (Fv/Fm), water use efficiency, ﻿superoxide dismutase (SOD) activity, catalase (CAT) activity, ﻿gene expression of OsSOD1, OsSOD2, OsSOD3, OsCATa, OsCATb, and OsCATc, organic acids, amino acids, tryptophan, putrescene, proline, GABA, expression of ealy flavonoids pathway genes, ﻿upregulated the early and late genes offlavonoid biosynthetic pathway, and total flavonoids content with weekly or biweekly application under salinity stress.  ↓intercellular CO2, hydrogen peroxide (H2O2), superoxide anion, lipid peroxidation (MDA, malondialdehyde), and lipoxygenase activity, ﻿and transcripts of late pathway genes with weekly or biweekly application under salinity stress. | 6.28 mg free amino acids L−1; 3.53 mg L−1 carbohydrates; 2.67 mg L−1 organic acids; 0.91 mg L−1 of fatty acids; and 314 mg L−1 of mineral nutrients. |
| Shakya et al., 2023 | Strawberry | ﻿*Ascophylum nodosoum* (﻿3 mL L−1 of Phylgreen® and 3 mL L−1 of ActyseiTM). | Drought stress: normal (control) and mild drought stress (50% field capacity). | ↑fruit length and fruit weight in Phylgreen® under mild drought stress.  ↑longest leaf, leaf area, chlorophyll, proline, in ActyseiTM under mild drought stress.  ↓root fresh weight, root dry weight in ActyseiTM under mild drought stress.  ↓leaf fresh weight under Phylgreen® under mild drought stress. | Phylgreen®:1.2% w/w mannitol; 2% w/w alginic acid; dry matter 15% ﻿w/w; and dry matter from seaweed extract ﻿16.5% w/v.  ActyseiTM: 0.7% mannitol; 2% glycine; 1% organic N; 1% P; and 8% K. |
| Vaghela et al., 2023 | Tomato | Minimally processed homogenates (MPHs) of seaweeds (*K. alvarezii* and *S. wightii*) with three dilution levels of ﻿0 %, 0.8 %, and 1.6 %. | Drought levels: well-watered and soil-moisture deficit conditions (skipping one irrigation cycle). | ↑The tomato yield with 0.8% application level under both water regimes. | ﻿KA: S 3.29%; N 0.33%; P 0.08%; Na 8.81%; K 30.24%; Ca 12,637 mg kg−1; Mg 9707 mg kg−1; etc.  SW: S 3.22%; N 0.09%; P 0.95%; Na 1.85%; K 9.72%; Ca 10.557 mg kg−1; Mg 7629 mg kg−1; etc. |
| Zhang et al., 2023 | ﻿Tomato | ﻿﻿Ascovip® 10% (v/v) | ﻿150 mM of salinity stress | ↑shoot and root fresh weight, shoot dry weight, ﻿quantum yield of the photosystem II (Phi2), relative chlorophyll, leaves minerals concentration (S, Ca, and Na), with Ascovip® application under salinity stress.  ﻿↓non-photochemical quenching (PhiNPQ), citrate, isocitrate, with Ascovip® application under salinity stress. | ﻿Free amino acids 15%; low molecular weight peptones 10%; organic C 10%; organic N 2%; and betaines 1%. |

**References from 78 studies for systematic reviews:**

1. Abdel-Sattar, M., Mostafa, L.Y., Rihan, H.Z., 2024. Enhancing mango productivity with wood vinegar, humic acid, and seaweed extract applications as an environmentally friendly strategy. Sustain. 16. https://doi.org/10.3390/su16208986
2. Ahmed, M., Ullah, H., Himanshu, S.K., García-Caparrós, P., Tisarum, R., Cha-um, S., Datta, A., 2024. *Ascophyllum nodosum* seaweed extract and potassium alleviate drought damage in tomato by improving plant water relations, photosynthetic performance, and stomatal function. J. Appl. Phycol. 36, 2255–2268. https://doi.org/10.1007/s10811-024-03266-2
3. Akhbarfar, G., Nikbakht, A., Etemadi, N., Gailing, O., 2023. Physiological and biochemical responses of plantain trees (*Platanus orientalis* L.) derived from different ages to drought stress and *Ascophyllum nodosum* L. Extract. J. Soil Sci. Plant Nutr. 23, 5945–5961. https://doi.org/10.1007/s42729-023-01452-8
4. Alasvandyari, F., Mahdavi, B., Rahimi, A., 2024. Alleviating the water deficit stress effect on *Zea mays* L. using an extract of the seaweed *Sargassum boveanum*. J. Appl. Phycol. 36, 2951–2960. https://doi.org/10.1007/s10811-024-03282-2
5. Alebidi, A., Abdel-Sattar, M., 2024. Synergistic effect of seaweed extract and boric acid and/or calcium chloride on productivity and physico-chemical properties of Valencia orange. PeerJ 12. https://doi.org/10.7717/peerj.17378
6. Ali, E.S.E.S.E.S., El-Samad, E.E.D.H.A., Abdelaal, H.A., AbouSekken, M.S., 2023. Enhancement of quinoa grain yield and nutritional quality by potassium fertilization combined with foliar spraying of seaweed extract. J. Ecol. Eng. 24, 341–356. https://doi.org/10.12911/22998993/158384
7. Ali, O., Farrell, A.D., Ramsubhag, A., Jayaraman, J., 2024. Beneficial effects of an *Ascophyllum nodosum* extract on tomato (*Solanum lycopersicum* L.) during water stress. J. Appl. Phycol. 36, 385–397. https://doi.org/10.1007/s10811-023-03156-z
8. Al-Saif, A.M., Sas-Paszt, L., Awad, R.M., Mosa, W.F.A., 2023. Apricot (*Prunus armeniaca*) performance under foliar application of humic acid, brassinosteroids, and seaweed extract. Horticulturae 9. https://doi.org/10.3390/horticulturae9040519
9. Amato, G., Cardone, L., Cicco, N., Denora, M., Perniola, M., Casiello, D., De Martino, L., De Feo, V., Candido, V., 2024. Morphological traits, yield, antioxidant activity and essential oil composition of oregano as affected by biostimulant foliar applications. Ind. Crops Prod. 222. https://doi.org/10.1016/j.indcrop.2024.119702
10. Ashour, M., Khairy, H.M., Bakr, A., Matter, M., Alprol, A.E., 2024. Seaweed liquid extract AS novel sustainable solutions for phycobioremediation plant germination, and feed additive for marine invertebrate copepod. Sci. Rep. 14, 1–21. https://doi.org/10.1038/s41598-024-80389-z
11. Baltrusch, K., Flórez-Fernández, N., Illera, M., Torres, M.D., López-Mosquera, M.E., Domínguez, H., 2023. Potential use of *Sargassum muticum* as source of plant biostimulants after three different drying methods. J. Appl. Phycol. 35, 921–933. https://doi.org/10.1007/s10811-023-02907-2
12. Bernardes, R. da S., Santos, S.C., Santos, C.C., Heid, D.M., Vieira, M.D.C., Torales, E.P., 2023. *Ascophyllum nodosum* seaweed extract and mineral nitrogen in *Alibertia edulis* seedlings. Rev. Bras. Eng. Agric. e Ambient. 27, 173–180. https://doi.org/10.1590/1807-1929/agriambi.v27n3p173-180
13. Bilias, F., Tsolis, V., Zafeiriou, I., Koukounaras, A., Kalderis, D., Chlouveraki, E., Gasparatos, D., 2024. Effects of sewage sludge biochar and a seaweed extract-based biostimulant on soil properties, nutritional status and antioxidant capacity of lettuce plants in a saline soil with the risk of alkalinization. J. Soil Sci. Plant Nutr. 7271–7287. https://doi.org/10.1007/s42729-024-02039-7
14. Cano-Benitez, M., Gross-Urrego, J.A., Pantoja-Benavides, A.D., Moreno-Poveda, G.A., Ramírez-Godoy, A., Chávez-Arias, C.C., Restrepo-Díaz, H., 2024. Doses and application method of seaweed extract to enhance physiological response for different “Hass” avocado stages in tropical environments. J. Agric. Sci. https://doi.org/10.1017/S0021859624000510
15. Chaudhary, N., Kothari, D., Walia, S., Ghosh, A., Vaghela, P., Kumar, R., 2023. Biostimulant enhances growth and corm production of saffron (*Crocus sativus* L.) in non-traditional areas of North western Himalayas. Front. Plant Sci. 14, 1–13. https://doi.org/10.3389/fpls.2023.1097682
16. Cirillo, A., Izzo, L., Ciervo, A., Ledenko, I., Cepparulo, M., Piscitelli, A., Di Vaio, C., 2024. Optimizing apricot yield and quality with biostimulant interventions: a comprehensive analysis. Horticulturae 10, 1–14. https://doi.org/10.3390/horticulturae10050447
17. Consentino, B.B., Vultaggio, L., Iacuzzi, N., La Bella, S., De Pasquale, C., Rouphael, Y., Ntatsi, G., Virga, G., Sabatino, L., 2023a. Iodine biofortification and seaweed extract-based biostimulant supply interactively drive the yield, quality, and functional traits in strawberry fruits. Plants 12. https://doi.org/10.3390/plants12020245
18. Consentino, B.B., Vultaggio, L., Sabatino, L., Ntatsi, G., Rouphael, Y., Bondì, C., De Pasquale, C., Guarino, V., Iacuzzi, N., Capodici, G., Mauro, R.P., 2023b. Combined effects of biostimulants, N level and drought stress on yield, quality and physiology of greenhouse-grown basil. Plant Stress 10. https://doi.org/10.1016/j.stress.2023.100268
19. Cortiello, M., Milc, J., Sanfelici, A., Martini, S., Tagliazucchi, D., Caccialupi, G., Ben Hassine, M., Giovanardi, D., Francia, E., Caradonia, F., 2024. Genotype and plant biostimulant treatments influence tuber size and quality of potato grown in the pedoclimatic conditions in Northern Apennines in Italy. Int. J. Plant Prod. 579–599. https://doi.org/10.1007/s42106-024-00311-5
20. da Silva, B.A., Silva, J. de S., da Silva, T.I., da Costa, R.S., de Castro, C.S., de Oliveira, L.K.B., de Sousa, T.R.M., Rodrigues, C.Y.A.C., Cardoso, F.B., Mesquita, R.O., 2024. Bioestimulant with *Ascophyllum nodosum* and fulvic acids as mitigating factors of salinity damage in soybean. Rev. Bras. Eng. Agric. e Ambient. 28. https://doi.org/10.1590/1807-1929/agriambi.v28n4e278961
21. Drygaś, B., Piechowiak, T., Balawejder, M., Matłok, N., Kreczko, J., Puchalski, C., 2024. The eliciting effect of aqueous extracts from *Ascophyllum nodosum* algae on the cultivation of arugula (*Eruca sativa* mill.) microgreens. Sustainability 16, 7436. https://doi.org/10.3390/su16177436
22. Dutta, S.K., Layek, J., Yadav, A., Das, S.K., Rymbai, H., Mandal, S., Sahana, N., Bhutia, T.L., Devi, E.L., Patel, V.B., Laha, R., Mishra, V.K., 2023. Improvement of rooting and growth in kiwifruit (*Actinidia deliciosa*) cuttings with organic biostimulants. Heliyon 9, e17815. https://doi.org/10.1016/j.heliyon.2023.e17815El Boukhari, M.E.M., Barakate, M., Drissi, B.E., Bouhia, Y., Lyamlouli, K., 2023. Seaweed extract biostimulants differentially act in mitigating drought stress on faba bean (*Vicia faba* L.). J. Plant Growth Regul. 42, 5642–5652. https://doi.org/10.1007/s00344-023-10945-w
23. El Boukhari, M.E.M., Barakate, M., Drissi, B.E., Bouhia, Y., Lyamlouli, K., 2023. Seaweed extract biostimulants differentially act in mitigating drought stress on faba bean (*Vicia faba* L.). J. Plant Growth Regul. 42, 5642–5652. https://doi.org/10.1007/s00344-023-10945-w
24. El-Shenody, R.A., Elshobary, M.E., Ragab, G.A., Huo, S., Essa, D., 2023. Towards biorefinery: Exploring the potential of seaweed-derived biodiesel and its residual biomass in improving the traits of *Eruca vesicaria* (L.) cav. South African J. Bot. 155, 361–371. https://doi.org/10.1016/j.sajb.2023.02.029
25. El-Ziat, R.A.M., Saudy, H.S., Hewidy, M., 2024. The alteration in physiological status, growth and essential oil profile of french marigold (*Tagetes patula* l.) owing to seaweed extract and salicylic acid application. J. Soil Sci. Plant Nutr. 24, 3909–3922. https://doi.org/10.1007/s42729-024-01811-z
26. Engel, D.C.H., Feltrim, D., Rodrigues, M., Baptistella, J.L.C., Mazzafera, P., 2023. Algae extract increases seed production of soybean plants and alters nitrogen metabolism. Agric. 13. https://doi.org/10.3390/agriculture13071296
27. Espinosa-Antón, A.A., Zamora-Natera, J.F., Zarazúa-Villaseñor, P., Santacruz-Ruvalcaba, F., Sánchez-Hernández, C.V., Águila Alcántara, E., Torres-Morán, M.I., Velasco-Ramírez, A.P., Hernández-Herrera, R.M., 2023. Application of seaweed generates changes in the substrate and stimulates the growth of tomato plants. Plants 12, 1–23. https://doi.org/10.3390/plants12071520
28. Farruggia, D., Di Miceli, G., Licata, M., Urso, G., Leto, C., Novak, J., 2024a. Seaweed extract and fulvic acid application affect the biomass performance, the essential oil yield and composition of Sicilian oregano grown in an organic agricultural system. Ind. Crops Prod. 222, 119790. https://doi.org/10.1016/j.indcrop.2024.119790
29. Farruggia, D., Di Miceli, G., Licata, M., Leto, C., Salamone, F., Novak, J., 2024b. Foliar application of various biostimulants produces contrasting response on yield, essential oil and chemical properties of organically grown sage (*Salvia officinalis* L.). Front. Plant Sci. 15, 1–20. https://doi.org/10.3389/fpls.2024.1397489
30. Fozi, V., Esmaeili, H., Alizadeh, A., Eghlima, G., Mirjalili, M.H., 2024. The interaction effect of water deficit stress and seaweed extract on phytochemical characteristics and antioxidant activity of licorice (*Glycyrrhiza glabra* L.). Front. Plant Sci. 15, 1–13. https://doi.org/10.3389/fpls.2024.1474399
31. Galal, H., Azzam, I.N., El-Howeity, M., Nofal, A.M., 2024. Effect of foliar application of macroalgae aqueous extracts on the nutrient status and fruit quality of “valencia” orange. Egypt. J. Bot. 64, 801–813. https://doi.org/10.21608/ejbo.2024.256269.2617
32. Gandhi, G., Gopalakrishnan, V.A.K., Veeragurunathan, V., Ghosh, A., 2024. Unlocking the potential of tropical red and brown seaweed-based biostimulants—a comparative assessment for sustainable maize (*Zea mays*) production. J. Appl. Phycol. 36, 1513–1531. https://doi.org/10.1007/s10811-023-03155-0
33. García-Cano, C., Ferrández-Gómez, B., Jordá, J.D., Pablo, Ó., Cerdán, M., Sánchez-Sánchez, A., 2025. Enhanced growth of cucumber (*Cucumis sativus* l.) through amino acids and seaweed extracts for the use in organic agriculture. J. Plant Growth Regul. https://doi.org/10.1007/s00344-024-11611-5
34. Gul, S., Abideen, Z., Adnan, M.Y., Hanif, M., Nawaz, M.F., Shumaila, Keblawy, A. El, 2023. Seaweed-derived bio-stimulant improves growth and salt tolerance of radish varieties under saline conditions. Biocatal. Agric. Biotechnol. 52, 102822. https://doi.org/10.1016/j.bcab.2023.102822
35. Gul, S., Nawaz, M.F., Bin Yousaf, M.T., Haroon U Rashid, M., Adnan, M.Y., Tausif, S., Javed, A., Abideen, Z., Keblawy, A. El, 2024. Brown macro-seaweeds derived agro-biostimulant for *Zea mays* farming in saline conditions: Growth enhancement and optimum biochemical and ion feedback. Biocatal. Agric. Biotechnol. 57, 103105. https://doi.org/10.1016/j.bcab.2024.103105
36. Hernández-Herrera, R.M., Gómez-Leyva, J.F., Sánchez-Hernández, C.V., Ocampo-Álvarez, H., Ramírez-Romero, R., Palmeros-Suárez, P.A., 2024. Seaweed extract ameliorates salt stress in tomato plants by enhancing the antioxidant system and expression of stress-responsive genes. J. Appl. Phycol. 36, 2269–2282. https://doi.org/10.1007/s10811-024-03236-8
37. Hussein, A.A., Sarabi, B., Weisany, W., 2024. Physiological and biochemical responses of Fenugreek (*Trigonella Foenum-graecum* L.) to arsenic stress and organic fertilizer amendments. J. Soil Sci. Plant Nutr. 1, 762–783. https://doi.org/10.1007/s42729-024-02165-2
38. Jesus, J.F. de, Santos, A.S., Sousa, R.O. de, Fonseca, B.S.F. da, Ferreira, W.S., Silva, R.F. da, Paula-Marinho, S. de O., Barroso, P.A., Luz, M.R., Alcântara Neto, F. de, Costa, J.H., Miranda, R. de S., 2024. *Ascophyllum nodosum*-derived biostimulant promotes physiological conditioning to increase soybean yield in a semiarid climate. J. Appl. Phycol. 3755–3768. https://doi.org/10.1007/s10811-024-03365-0
39. Karthik, T., Jayasri, M.A., 2023. Systematic study on the effect of seaweed fertilizer on the growth and yield of *Vigna radiata* (L.) R. Wilczek (Mung bean). J. Agric. Food Res. 14, 100748. https://doi.org/10.1016/j.jafr.2023.100748
40. Kisvarga, S., Horotán, K., Hamar-Farkas, D., Orlóci, L., 2024. Effects of humic acids, seaweed extract and *Equisetum arvense* L. extracts on morphological, histological and physiological parameters of the ornamental plant *Ocimum basilicum* rokokó. Horticulturae 10, 1–16. https://doi.org/10.3390/horticulturae10111231
41. Kovács, D., Horotán, K., Orlóci, L., Makádi, M., Mosonyi, I.D., Sütöri-Diószegi, M., Kisvarga, S., 2024. Morphological and physiological responses of *Weigela florida* ‘eva rathke’ to biostimulants and growth promoters. Horticulturae 10. https://doi.org/10.3390/horticulturae10060582
42. Krid, A., El Hallabi, M., Ennoury, A., Nhhala, N., Aberkani, K., Nhiri, M., Zerrouk, M.H., 2023. The potential of seaweed extracts as a biostimulant for improving salt stress tolerance of Solanum lycopersicum L. South African J. Bot. 161, 305–316. https://doi.org/10.1016/j.sajb.2023.08.020
43. Kumar, B.P., Sowntharya, V., Muthulaxmi, V., Perveen, K., Datta, R., Yogalakshmi, S., Venkatesh, S., Ravichandran, M., Dineshkumar, R., 2023. Ingenious enactment of *Halimeda macroloba*-sourced calcium for the improved agro-active response of *Arachis hypogea* L. Environ. Dev. Sustain. 26, 25133–25149. https://doi.org/10.1007/s10668-023-03673-4
44. Lobato, M.C., Olivieri, F.P., Machinandiarena, M.F., Becherucci, M.E., Feldman, M.L., 2023. *Undaria pinnatifida* (Harvey) Suringar aqueous extract activates potato defense responses against *Phytophthora infestans*. Physiol. Mol. Plant Pathol. 127, 102081. https://doi.org/10.1016/j.pmpp.2023.102081
45. Lopes, T., Silva, A.P., Ribeiro, C., Carvalho, R., Aires, A., Vicente, A.A., Gonçalves, B., 2024. *Ecklonia maxima* and glycine–betaine-based biostimulants improve blueberry yield and quality. Horticulturae 10, 920. https://doi.org/10.3390/horticulturae10090920
46. Mannan, A., Yasmin, A., Sarker, U., Bari, N., Dola, D.B., Higuchi, H., Ercisli, S., Ali, D., Alarifi, S., 2023. Biostimulant red seaweed (*Gracilaria tenuistipitata* var. liui) extracts spray improves yield and drought tolerance in soybean. PeerJ 11, 1–21. https://doi.org/10.7717/peerj.15588
47. Marey, R., Elmasry, H., 2024. Vegetative Growth, yield, and quality of onion as influenced by nitrogen rates and natural stimulators. Egypt. J. Soil Sci. 64, 0–0. https://doi.org/10.21608/ejss.2023.229168.1638
48. Mattner, S.W., Villalta, O.N., McFarlane, D.J., Islam, M.T., Arioli, T., Cahill, D.M., 2023. The biostimulant effect of an extract from *Durvillaea potatorum* and *Ascophyllum nodosum* is associated with the priming of reactive oxygen species in strawberry in south-eastern Australia. J. Appl. Phycol. 35, 1789–1800. https://doi.org/10.1007/s10811-023-02979-0
49. Mbuyisa, S., Bertling, I., Ngcobo, B.L., 2024. Impact of foliar-applied plant extracts on growth, physiological and yield attributes of the potato (*Solanum tuberosum* L.). Agronomy 14, 1–12. https://doi.org/10.3390/agronomy14040746
50. Melo, G.B., da Silva, A.G., da Costa, A.C., Alves da Silva, A., Rosa, M., Bessa, L.A., Rodrigues, C.R., Castoldi, G., Vitorino, L.C., 2024. Foliar application of biostimulant mitigates water stress effects on soybean. Agronomy 14. https://doi.org/10.3390/agronomy14030414
51. Mohamed, A.A., Sameeh, M.Y., El-Beltagi, H.S., 2023. Preparation of seaweed nanopowder particles using planetary ball milling and their effects on some secondary metabolites in date palm (*Phoenix dactylifera* L.) seedlings. Life 13. https://doi.org/10.3390/life13010039
52. Mutlu-Durak, H., Arikan-Algul, Y., Bayram, E., Haznedaroglu, B.Z., Kutman, U.B., Kutman, B.Y., 2024. Various extracts of the brown seaweed *Cystoseira barbata* with different compositions exert biostimulant effects on seedling growth of wheat. Physiol. Plant. 176, 1–16. https://doi.org/10.1111/ppl.14503
53. Nikoogoftar-Sedghi, M., Rabiei, V., Razavi, F., Molaei, S., Khadivi, A., 2023. The effect of foliar application of *Ascophyllum nodosum* (L.) Le Jol. seaweed extract on biochemical traits related to abiotic stresses in pistachio (*Pistacia vera* L. cv. Kaleh-Ghoochi). BMC Plant Biol. 23, 1–11. https://doi.org/10.1186/s12870-023-04654-5
54. Nivetha, N., Shukla, P.S., Nori, S.S., Kumar, S., Suryanarayan, S., 2024. A red seaweed *Kappaphycus alvarezii*-based biostimulant (AgroGain®) improves the growth of *Zea mays* and impacts agricultural sustainability by beneficially priming rhizosphere soil microbial community. Front. Microbiol. 15, 1–18. https://doi.org/10.3389/fmicb.2024.1330237
55. Ntanasi, T., Karavidas, I., Spyrou, G.P., Giannothanasis, E., Aliferis, K.A., Saitanis, C., Fotopoulos, V., Sabatino, L., Savvas, D., Ntatsi, G., 2024. Plant biostimulants enhance tomato resilience to salinity stress: insights from two greek landraces. Plants 13, 1–20. https://doi.org/10.3390/plants13101404
56. Qiqin, L., Huaguang, Z., Minxiu, S., Qian, L., Haijun, F., Haimin, C., Rui, Y., 2023. Improvement of soil structure and bacterial composition by long-term application of seaweed fertilizer. J. Soil Sci. Plant Nutr. 23, 5122–5132. https://doi.org/10.1007/s42729-023-01341-0
57. Pacheco, D., Cotas, J., Pereira, L., Bahcevandziev, K., 2023. A possible synergistic approach: case study of *Saccharina latissima* extract and nitrifying bacteria in lettuce. J. Mar. Sci. Eng. 11. https://doi.org/10.3390/jmse11091645
58. Radwan, A.M., Ahmed, E.A., Donia, A.M., Mustafa, A.E., Balah, M.A., 2023. Priming of *Citrullus lanatus* var. Colocynthoides seeds in seaweed extract improved seed germination, plant growth and performance under salinity conditions. Sci. Rep. 13, 1–12. https://doi.org/10.1038/s41598-023-38711-8
59. Rana, V.S., Lingwal, K., Sharma, S., Rana, N., Pawar, R., Kumar, V., Sharma, U., 2023. Enhancement in growth, yield and nutritive characteristics of strawberry (*Fragaria × ananassa* Duch.) by the application of biostimulant: seaweed extract. Acta Physiol. Plant. 45, 1–12. https://doi.org/10.1007/s11738-023-03602-y
60. Rasouli, F., Nasiri, Y., Hassanpouraghdam, M.B., Asadi, M., Qaderi, T., Trifa, A., Strzemski, M., Dresler, S., Szczepanek, M., 2023. Seaweed extract and arbuscular mycorrhiza co-application affect the growth responses and essential oil composition of *Foeniculum vulgare* L. Sci. Rep. 13, 1–13. https://doi.org/10.1038/s41598-023-39194-3
61. Sabatino, L., Consentino, B.B., Rouphael, Y., Baldassano, S., De Pasquale, C., Ntatsi, G., 2023. *Ecklonia maxima*-derivate seaweed extract supply as mitigation strategy to alleviate drought stress in chicory plants. Sci. Hortic. (Amsterdam). 312, 111856. https://doi.org/10.1016/j.scienta.2023.111856
62. Samuels, L.J., Papageorgiou, A.E., Setati, M.E., Blancquaert, E.H., 2024. Effects of *Ecklonia maxima* seaweed extract on the fruit, wine—quality and microbiota in *Vitis vinifera* L. cv. Cabernet Sauvignon. South African J. Bot. 172, 647–662. https://doi.org/10.1016/j.sajb.2024.07.051
63. Santos, C.C., Silva, A.A.S., Carvalho de Oliveira, C.H., Silverio, J.M., dos Santos Dias, A., Linné, J.A., de Paula Quintão Scalon, S., Alovisi, A.M.T., 2023. *Ascophyllum nodosum* seaweed extract in *Inga edulis* seedlings under drought and the potential of phenotypic plasticity. J. Appl. Phycol. 35, 3123–3135. https://doi.org/10.1007/s10811-023-03094-w
64. Santos, D., Cotas, J., Pereira, L., Bahcevandziev, K., 2024. Algae extracts in horticulture: characterization of algae-based extracts and impact on turnip germination and radish culture. Sustain. 16. https://doi.org/10.3390/su16062529
65. Seğmen, E., Özdamar Ünlü, H., 2023. Effects of foliar applications of commercial seaweed and *spirulina platensis* extracts on yield and fruit quality in pepper (*Capsicum annuum* L.). Cogent Food Agric. 9. https://doi.org/10.1080/23311932.2023.2233733
66. Shahzad, R., Harlina, P.W., Gallego, P.P., Flexas, J., Ewas, M., Leiwen, X., Karuniawan, A., 2023. The seaweed *Ascophyllum nodosum*-based biostimulant enhances salt stress tolerance in rice (*Oryza sativa* L.) by remodeling physiological, biochemical, and metabolic responses. J. Plant Interact. 18. https://doi.org/10.1080/17429145.2023.2266514
67. Shakya, R., Capilla, E., Torres-Pagán, N., Muñoz, M., Boscaiu, M., Lupuţ, I., Vicente, O., Verdeguer, M., 2023. Effect of two biostimulants, based on *Ascophyllum nodosum* extracts, on strawberry performance under mild drought stress. Agric. 13. https://doi.org/10.3390/agriculture13112108
68. Shang, X. chao, Zhang, M., Zhang, Y., Hou, X., Yang, L., 2023b. Waste seaweed compost and rhizosphere bacteria *Pseudomonas koreensis* promote tomato seedlings growth by benefiting properties, enzyme activities and rhizosphere bacterial community in coastal saline soil of Yellow River Delta, China. Waste Manag. 172, 33–42. https://doi.org/10.1016/j.wasman.2023.09.003
69. Shukla, P.S., Nivetha, N., Nori, S.S., Kumar, S., Critchley, A.T., Suryanarayan, S., 2023. A biostimulant prepared from red seaweed *Kappaphycus alvarezii* induces flowering and improves the growth of *Pisum sativum* grown under optimum and nitrogen-limited conditions. Front. Plant Sci. 14, 1–18. https://doi.org/10.3389/fpls.2023.1265432
70. Sivakumar, S.R., Ravichandran, M., Dineshkumar, R., 2024. Economical probing of *Chaetomorpha aerea* seaweed biostimulant and harnessing its growth sustainability potential on *Arachis hypogaea* L. Biomass Convers. Biorefinery. https://doi.org/10.1007/s13399-024-05574-6
71. Unal, D., Gurbanov, R., Sevim, G., Samgane, G., Varış, G., Ozdemir-Kocak, F., Tuney-Kizilkaya, I., 2023. Dose-dependent plant-promoting effect of macroalgae *Stypopodium schimperi* extracts in *Solanum lycopersicum* and detection of phloroglucinol composition. J. Soil Sci. Plant Nutr. 23, 2018–2029. https://doi.org/10.1007/s42729-023-01156-z
72. Vaghela, P., Trivedi, K., Anand, K.G.V., Brahmbhatt, H., Nayak, J., Khandhediya, K., Prasad, K., Moradiya, K., Kubavat, D., Konwar, L.J., Veeragurunathan, V., Grace, P.G., Ghosh, A., 2023. Scientific basis for the use of minimally processed homogenates of *Kappaphycus alvarezii* (red) and *Sargassum wightii* (brown) seaweeds as crop biostimulants. Algal Res. 70, 102969. https://doi.org/10.1016/j.algal.2023.102969
73. van Tol de Castro, T.A., Tavares, O.C.H., de Oliveira Torchia, D.F., Oliveira da Silva, H.F., de Moura, O.V.T., Cantarino, R.E., de Abreu Lopes, S., Viêgas, C.V., do Amaral Vendramini, A.L., Santos, L.A., Berbara, R.L.L., García, A.C., 2023. Organic fragments of k-carrageenan, lipids and peptides plus K-rich inorganic fraction in *Kappaphycus alvarezii* biomass are responsible for growth stimulus in rice plant when applied both foliar and root pathway. Algal Res. 71. https://doi.org/10.1016/j.algal.2023.103040
74. Vinothkumar, V., Janaki, P., Parameswari, E., Suganthy, M., Krishnan, R., 2024. Enhancing nutrient bioavailability by balancing antioxidant and antinutritional properties in organic tomatoes using *Kappaphycus alvarezii* based biostimulants 13, 753–762.
75. Yao, Y., Wang, X., Chen, B., Zhang, M., Ma, J., 2020. Seaweed extract improved yields, leaf photosynthesis, ripening time, and net returns of tomato (*Solanum lycopersicum* Mill.). ACS Omega 5, 4242–4249. https://doi.org/10.1021/acsomega.9b04155
76. Yuan, Y., Dickinson, N., 2024. Revealing the complex interplay of biostimulant applications. Plants 13, 1–16. https://doi.org/10.3390/plants13162188
77. Zamljen, T., Šircelj, H., Veberič, R., Hudina, M., Slatnar, A., 2024. Impact of two brown seaweed (*Ascophyllum nodosum* l.) biostimulants on the quantity and quality of yield in cucumber (*Cucumis sativus* L.). Foods 13. https://doi.org/10.3390/foods13030401
78. Zhang, L., Freschi, G., Rouphael, Y., De Pascale, S., Lucini, L., 2023. The differential modulation of secondary metabolism induced by a protein hydrolysate and a seaweed extract in tomato plants under salinity. Front. Plant Sci. 13, 1–12. https://doi.org/10.3389/fpls.2022.1072782
